# Supplementary material for: A comparative analysis of label-free liquid chromatography-mass spectrometry liver proteomic profiles highlights metabolic differences between pig breeds
Source: PLoS One. 2018 Sep 12;13(9):e0199649. doi: 10.1371/journal.pone.0199649 (PMC6135354; doi:10.1371/journal.pone.0199649)
Supplement: S1 Table — (XLSX) [file pone.0199649.s001.xlsx]

## Sheet: S1_Table
S1 Table. List of the 329 proteins used to group the liver proteins according to their different biological processes.
Uniprot accession	Protein Prophet score	Protein description	Sequence Coverage %	Unique Peptides	Peptides Sequences
F1RVZ1	1	Peroxisomal acyl-coenzyme A oxidase 1	19.5	8	AAASFNPELLTHVLDGSPENTR+AAASFNPELLTHVLDGSPENTRR+EAAWNLTSIDLVR+EFGLADPDEILWFK+GLETTATYDPATEEFILNSPTVTSIK+IQPQQVAAWPTVADINSPDSLIEAYR+QGDLSGLPELHALTAGLK+SFLVGEAAR
F1RUN2	1	Serum albumin	80.1	50	AACLLPK+ADFTEISK+AWSLAR+CCAAPDHEACFAVEGPK+CCTESLVNR+DELPADLNPLEHDFVEDKEVCK+DVFLGTFLYEYSR+DVFSECCQAADK+EDPPACYATVFDKFQPLVDEPK+EFVEGTFTFHADLCTLPEDEK+EHYGDLADCCEKEEPERNECFLQHK+ELFEK+EVTEFAK+FKDLGEQYFK+FQPLVDEPK+FVIEIR+GLVLIAFSQHLQQCPYEEHVK+HKPHATEEQLR+IVTDLAK+IYEATLEDCCAKEDPPACYATVFDK+IYEATLEDCCAKEDPPACYATVFDKFQPLVDEPK+KLGLVGSR+KQTALVELLK+KVPQVSTPTLVEVAR+LCAIPSLR+LCVLHEK+LEHLR+LGEYGFQNALIVR+LGLVGSR+…
I3LNB4	1	Delta-1-pyrroline-5-carboxylate mitochondrial	29.9	9	AADMLSGPR+EAGLPPNIIQFVPADGPTFGDTVTSSEHLCGINFTGSVPTFK+IKVGDPAEDFGTFFSAVIDAK+LVDSTTSYGLTGAVFAQDKDVVR+LYVPGSLWPQIK+SADVDSVVSGTLR+STGSVVGQQPFGGAR+TVIQAEIDAAAELIDFFR+VGDPAEDFGTFFSAVIDAK
F1SSS0	1	Isoform 3 of carbamoyl-phosphate synthase	72.8	86	AADTIGYPVMIR+AERPDGLILGMGGQTALNCGVELFR+AERPDGLILGMGGQTALNCGVELFRR+AFAISGPFNVQFLVK+AFAMTNQILVER+ALEDNMSLDEIMK+AMLSTGFK+APMFSWPR+AQTAHIVLEDGTK+ATGYPLAFIAAK+AVNTLNEALEFAK+CEMASTGEVACFGEGIHTAFLK+DGSIDLVINLPNNNTK+EIEFEVVR+EIGFSDK+ELADPSSTR+EPLFGISTGNLITGLAAGAK+EVEMDAVGK+EVEMDAVGKDGR+EWPSNIDLR+FIEGAR+FLEEATR+FLGVAEQLHNEGFK+FVHDNYVIR+GAEVHVVPWNHDFTNMEYDGLLIAGGPGNPALAEPLIQNVK+GKGTTITSVLPKPALVASR+GLNSESIT…
Q2XQV4	1	Aldehyde dehydrogenase, mitochondrial	50.5	23	AAFQLGSPWR+ANYLSQALQAGTVWVNCYDVFGAQSPFGGYK+DLDKANYLSQALQAGTVWVNCYDVFGAQSPFGGYK+EAGFPPGVVNIVPGYGPTAGAAIASHEDVDKVAFTGSTEVGHLIQVAAGK+EEIFGPVMQILK+ELGEYGLQAYTEVK+GYFIQPTVFGDVQDGMTIAK+GYFIQPTVFGDVQDGMTIAKEEIFGPVMQILK+HEPVGVCGQIIPWNFPLLMQAWK+LADLIER+LGPALATGNVVVMK+LLCGGGAAADR+RLLLRPAALAAARLVLR+TEQGPQIDETQFKK+TFPTVNPSTGDVICHVAEGDKEDVDR+TFPTVNPSTGDVICHVAEGDKEDVDRAVEAAR+TFVQEDIYAEFVER+TIEEVIGR+TLPIDGDYFSY…
F1S0M2	1	Ribonuclease uk114	93.4	9	AAGCDFTNVVK+AAYQVAALPK+APAAIGPYSQAVLVDR+KVISTVK+QALTNMGEILK+QYFQGNFPAR+TIYISGQIGMDPASGQLVPGGVVEEAK+TTVLLADINDFSTVNDIYK+VEIEAIAIQGPLVTASL
P37111	1	Aminoacylase-1	57.1	11	AAGVPALGFSPMNHTPVLLHDHDER+AGFALDEGLASPTDAFTVFYSER+CVSIQYLEAVR+EGEHPSVTLFR+FIEDTAAEK+LALELEICPASTDAR+LQSNQLKPGAVTSVNLTMLEGGVAYNVVPATMSACFDFR+TIHMTFVPDEEVGGHQGMELFVK+TVQPEPDYGAAVAFLEER+VEVVPGHVVTVLTWPGTNPTLSSILLNSHTDVVPVFK+VINSILAFR
F1S0Y8	1	Alcohol dehydrogenase 4	46.3	12	AAIAWEANKPLNIEEVEVAPPK+AALDSVTAGWGLCTIIGVNVGDSGLR+ALGATDCLNPR+FNLDALVSHTLPFDK+FNLDALVSHTLPFDKINEAFDLMYQGK+GKPIYHFMGTSTFSQYTVVSDVNLVK+IDDDANLER+LAADYK+LMEDETSR+VCLLGCAFSTGYGAVVNTAK+VIPLYLPQCGK+VSSVELIMGR
F1S1E7	1	Dihydropyrimidinase	41.2	12	AALAGGTTMIIDFAIPHK+AITIASAVNCPLYVVHVMSK+DLLPPGGAPAGLR+FVAVTSTNAAK+GHSLVEAFETWR+IAVGSDADIVIWDPK+LVLPGGIDTHTHMQFPFMGSR+MLALGITGPEGHELCRPEAVEAEATLR+SVDDFHQGTK+THHQAVNFNIFEGMVCHGVPLVTISR+VVNDDSSQVADVLVEDGVVR+VVYGEPIAAGLGTDGTHYWNR
Q8MJ30	1	Dihydropteridine reductase	16.9	3	AALDGTPGMIGYGMAK+DSGMPSGAAAIAVLPVTLDTPLNR+DSGMPSGAAAIAVLPVTLDTPLNRK
I3LAK4	1	Pyruvate kinase	18.1	5	AALGPEGQGIK+AETSDVANAVLDGADCIMLSGETAK+ASLAQLTQELGTAFFQR+GDLGIEIPAEK+QQLPAAMADSFLEHLCLLDIDSEPVAAR
Q9TTN8	1	Pyruvate kinase PKLR-like	38.8	8	AALGPEGQGIK+ASLAQLTQELGTAFFQR+EAVESFAGSPLIYRPVAIALDTK+IGPEGLETQVESGGVLGSR+IYIDDGLISLVVTK+QQLPAAMADSFLEHLCLLDIDSEPVAAR+TGIPQGGPTSEVELVK+VLVTVDPAFQK
D0G0B3	1	Acetyl-Coenzyme A acyltransferase 2	64.5	17	AALSAGNVSPETIDSVIVGNVMQSSSDAIYLAR+AANDAGYFNNEMAPIEVK+AGLSLKDMDLVEVNEAFAPQYLAVEK+DFTATDLTEFAAR+DMDLVEVNEAFAPQYLAVEK+EGTVTAGNASGISDGAGAVIIASEDAVK+EGTVTAGNASGISDGAGAVIIASEDAVKK+ETPALTVNR+GVFIVAAK+IVGYFASGCDPSIMGIGPVPAITGALK+IVGYFASGCDPSIMGIGPVPAITGALKK+LEDSLWTGLTDQHIQIPMAITAENLAAK+LGLDLK+RTPFGAFGGLLK+SLDLDPSKTNVNGGAIALGHPLGGSGAR+TPFGAFGGLLK+VVLCGGTESMSQAPYCVR
I3LIA4	1	Guanidinoacetate n-methyltransferase	63.1	11	AAPAAYDASDTHLQILGKPVMER+LLKPGGVLTYCNLTSWGELMK+LQDWAQQQPHK+SKYSDITTMFQETQVPALLEAGFR+TQVMELVPPADCR+VQEGAIDEHWIIECNDGVFQR+WETPYMHALAAVAASK+YSDITTMFQETQVPALLEAGFR+YSDITTMFQETQVPALLEAGFRQENIR+YYAFPQMITPLVTK+YYAFPQMITPLVTKQ
P01846	1	Ig lambda chain C region	70.5	4	AAPTVNLFPPSSEELGTNK+AGGTTVTQGVETTKPSK+ATLVCLISDFYPGAVTVTWK+SSSGFTCQVTHEGTIVEK
Q0MVN8	1	Quinone oxidoreductase	45.5	9	AAQAHEDIIHSR+DNQVLIK+GPIEINPR+LQSDVAIPIPK+SGTHNMKPLLPYTPGLDVAGIVEAVGEHVSSFK+VFTVSTLSGGYAEYALAADDTVYMLPEKLDFK+VHACGVNPVDTYIR+VIIVGSR+VLGTAGTEEGQNIVLQNGAHEVFNHR
F1SA74	1	C-1-tetrahydrofolate synthase, cytoplasmic	19.7	10	AAQAPSSFQLLYDLELPIEDK+AAQAPSSFQLLYDLELPIEDKIR+AGFITPVPGGVGPMTVAMLMQSTVESAEHFLEK+DAIKPNLMQTLEGTPVFVHAGPFANIAHGNSSIIADR+GVPTGFVLPIR+IYGADDIELLPEAQHK+LDIDPETITWQR+MFGVPVVVAVNAFK+QGFGNLPICMAK+TANLNEEVNKGDIVVVAAGKPEMVK
F1RL81	1	17-beta-hydroxysteroid dehydrogenase 14	53.3	8	AAQCSVPAGASVIP+ALALDESQYGVR+EGTLAQPLGR+GNVINISSLVGAIGQSQAVPYVATK+LDCVVNNAGSHPPLQWPEETSIQGFR+TLEQELPGSVFVLCDVTQEDDVK+VNCISPGNIWTPLWEELAASTPDPK+VVIVTGGGR
F1SGS9	1	Catalase	68.7	32	AAQKPDILTTGSGNPIGDK+AAQKPDILTTGSGNPIGDKLNILTAGPR+DAILFPSFIHSQK+DAILFPSFIHSQKR+DAQIFIQK+DGPMCFQDNQGGAPNYYPNSFSAPEQTHSALEHCTR+FNSANEDNVTQVR+FSTVAGESGSADTVR+FSTVAGESGSADTVRDPR+FYTEDGNWDLVGNNTPIFFIR+GAGAFGYFEVTHDITR+GIPDGHR+GPLLVQDVVFTDEMAHFDR+GPLLVQDVVFTDEMAHFDRER+IQALLDKYNAEKPK+LCENIAGHLK+LCENIAGHLKDAQIFIQKK+LFAYPDTHR+LGPNYLQIPVNCPFR+LSQEDPDYGIR+LVLNR+LVNEKGEAVYCK+NAVHTYVQAGSHLAAR+NFSDVHPDYGAR+NLSV…
F1SFZ8	1	Talin-1	13.8	16	AATAPLLEAVDNLSAFASNPEFSSVPAQISPEGR+ALDGAFTEENR+AVAEQIPLLVQGVRGSQAQPDSPSAQLALIAASQSFLQPGGK+AVSSAIAQLLGEVAQGNENYAGIAAR+AVSSAIAQLLGEVAQGNENYAGIAAREVAGGLRSLAQAAR+EAAFHPDVAPDVR+EGISQEALHTQMLTAVQEISHLIEPLASAAR+GHMPPLTSAQQALTGTINSSMQAVQAAQATLDDFDTLPPLGQDAASK+GTEWVDPEDPTVIAENELLGAAAAIEAAAK+GVAALTSDPAVQAIVLDTASDVLDK+GVAALTSDPAVQAIVLDTASDVLDKASSLIEEAK+GVAALTSDPAVQAIVLDTASDVLDKASSLIEEAKK+GVGAAATAVTQALNELLQH…
F1S0C1	1	Alcohol dehydrogenase	51.1	10	AAVAWEAGKPLSIEEIEVAPPK+AGDTVIPLYIPQCGECK+AKEFGASECINPQDFSKPIQEVLIEMTDGGVDYSFECIGNVK+IDPLAPLDK+IIATAVCHTDAYTLSGADPEGSFPVILGHEGAGIVESVGEGVTK+IIGVDINK+IIGVDINKDK+IKVDEFVTHNLPFDQINEAFELMHAGK+VCLLGCGVSTGYGAAVNTAK+VDEFVTHNLPFDQINEAFELMHAGK
F1SJX1	1	Electron transfer flavoprotein subunit mitochondrial	52	11	AAVDAGFVPNDMQVGQTGK+ASSASPVGISEWLDQK+GLLPEELTPLVLATQK+IVAPELYIAVGISGAIQHLAGMK+IVAPELYIAVGISGAIQHLAGMKDSK+LDVAPISDIIAIK+LLYDLADQLHAAVGASR+SPDTFVRPIYAGNALCTVK+TIVAINKDPEAPIFQVADYGIVADLFK+VLVAQHDAYK+VVPEMTELLK
F1SMZ7	1	60 kda heat shock mitochondrial	64.3	28	AAVEEGIVLGGGCALLR+ALMLQGVDLLADAVAVTMGPK+CEFQDAYVLLSEK+CEFQDAYVLLSEKK+DMAIATGGAVFGEEGLTLNLEDVQPHDLGK+DPGMGGMGGMGGGMGGGMF+GANPVEIR+GVMLAVDAVIAELKK+GYISPYFINTSK+IGLEIIKK+ILQSSPEVGYDAMLGDFVNMVEK+IQEIIEQLDVTTSEYEKEK+ISSVQSIVPALEIANAHR+KISSVQSIVPALEIANAHR+LSDGVAVLK+LVLNR+LVQDVANNTNEEAGDGTTTATVLAR+NAGVEGSLIVEK+QSKPVTTPEEIAQVATISANGDKEIGNIISDAMK+QSKPVTTPEEIAQVATISANGDKEIGNIISDAMKK+TALLDAAGVASLLTTAEVVVTEI…
F1RJS3	1	Bifunctional epoxide hydrolase 2	31.4	11	AAVFDLDGVLALPSITTSWAR+AEPNEVVFLDDVGTHLKPVR+ANPVFDYQLYFQEPGVAEAELEQNLDR+AVASLNTPFMPSNPNVSPMEIIK+DLGMATILVHDTDTALR+DLGMATILVHDTDTALRELEK+ELGGLFVGTPEEPSLSR+ILIEWLETDAR+ILIEWLETDARNPLVDSKL+ILIPALMVTAENDLVLHPK+LMLDTLKAEPNEVVFLDDVGTHLKPVR
A0A287BPT2	1	Alcohol dehydrogenase 1C (class I), gamma polypeptide	55.2	17	AAVLWELEKPFSIEEVEVAPPK+AAVLWELEKPFSIEEVEVAPPKAYEVR+AYEVR+AYGVSVIVGVPPNSQNISINPMLLLNGR+GAIFGGFK+GKPILQFLGTSTFTQYTVVDEMSVAK+GTLSDGTSR+IDAASPLEK+IDTMISALLCCQK+IIGVDINK+IIGVDINKDK+INEGFELLR+LVADFMAK+MVATGICR+VCLIGCGFSTGYGSAIK+VIPLFVPQCGK+VTQGSTCAVFGLGGVGLSVVMGCK
I3LK59	1	Enolase	39.8	10	AAVPSGASTGIYEALELR+DATNVGDEGGFAPNILENK+DATNVGDEGGFAPNILENKEALELLK+GNPTVEVDLHTAK+GVPLYR+HIADLAGNAEVILPVPAFNVINGGSHAGNK+IGAEVYHNLK+LAMQEFMILPVGAETFR+TIAPALVSK+YISPDQLADLYK
K7GKJ8	1	Phosphoglycerate kinase (Fragment)	46.4	9	ACADPAAGSVILLENLR+ALESPERPFLAILGGAK+IGQATVASGIPAGWMGLDCGPESSKK+ITLPVDFVTADKFDENAK+LGDVYVNDAFGTAHR+SVVLMSHLGRPDGIPMPDKYSLEPVAVELK+VLNNMEIGTSLFDEEGSK+VLPGVDALSNV+WNTEDKVSHVSTGGGASLELLEGK
P21695	1	Glycerol-3-phosphate dehydrogenase [NAD+], cytoplasmic	20.6	4	ADAIGLSLIK+LGIPMSVLMGANIANEVADEK+LGIPMSVLMGANIANEVADEKFCETTIGCK+LPPNVVAVPDVVQASADADILIFVVPHQFIGK
F1RPB1	1	Acyl-CoA synthetase medium-chain family member 4	42.4	17	ADDVIISAGYR+AFVVLSAPFK+CIVASDEVVPAVESAASECPDLK+ELGSLSR+GGFYVTGDR+GQEIKPGSMGIR+GVMDSDGYFR+HCLTGGEPLNPEVLEQWR+IGPFEVESALIEHPAVAESAVVSSPDPIRGEVVK+LLVSPHSR+MAQFDTDTVLDVLATYPITTLCGPPTVYR+SFNFAADVLDQWSQK+SSNPEQLTLELQDHVK+SSNPEQLTLELQDHVKK+TGERPANPALWWVNSQGNEVK+TGLVFMPGTTQLTAK+VAMILPR
P51781	1	Glutathione S-transferase alpha M14	70.4	17	ADIQLVELLYYVEELDPSLLANFPLLK+AILNYIATK+ALIDMYTEGVADLGEMILLLPLCPPNEK+ALIDMYTEGVADLGEMILLLPLCPPNEKDAK+ALIDMYTEGVADLGEMILLLPLCPPNEKDAKVASIK+FIKTPEDLDKLTNDGSLLFQQVPMVEIDGMK+FLQPGSQR+KFLQPGSQR+LTNDGSLLFQQVPMVEIDGMK+MECLR+SHGQDYLVGNK+TPEDLDKLTNDGSLLFQQVPMVEIDGMK+VSNLPTVK+VSNLPTVKK+WLLAAAGVEFEEK+YLPAFEK+YNLYGK
O02705	1	Heat shock protein HSP 90-alpha	15	12	ADLINNLGTIAK+ALLFVPR+DQVANSAFVER+GVVDSEDIPLNLSR+HGLEVIYMIEPIDEYCVQQLK+HLEINPDHSIIETLR+HSQFIGYPITLFVEK+TLTLVDTGIGMTK+TLVSVTK+VFIMDNCEELIPEYLNFIR+VVVSNR+YIDQEELNK
I3LR71	1	Fatty acid synthase	13.6	17	ADLLVCNCALATLGDPAVAVGNMAATLK+ALSQNLEETPVVFEDVTLHQATILPK+AMMANR+DAVLENQTPEFFQDVSKPK+DLAFVGMLNEIAAVSPVAMPFR+DNLEFFLSNVGR+DTVTISGPQAAMSEFLQQLK+IPALLNTQPVMDLDYTATDRNPQALEAAQAK+LEQLHVTQGQWDPANPAPGSLGK+LHLAGVSVNPNGLFPPVEFPAPR+LPESENLEEFWANLIGGVDMVTADDRR+LSPDSIPGK+QQATLNLSTLLVNPEGPTLTR+SLITEATQLGPVGGVFNLAMVLR+TLEAVQTLLEQGLR+TLLEGSGLESILSIIHSCLAEPR+VLEALIPLQGLEAR
Q9NVL8	1	Uncharacterized protein	21.7	6	ADMGGAATICSTIVSAAK+ANKPGDVVR+GITFDSGGISIK+GSPDASDPPLVFVGK+LDLPINLVGLAPLCENMPSGK+SWIEEQEMGSFLSVAK
Q29554	1	Trifunctional enzyme subunit alpha, mitochondrial	19	10	ADMVIEAVFEELSLK+AENLGK+DSLFSNLTGQLDYQGFEK+EVEAVIPDHCVFASNTSALPISEIAAVSK+ILQEGVGPK+KLDSLTTSFGFPVGAATLMDEVGMDVAK+MQLLEIITTEK+MVGVPAAFDMMLTGR+NVNSDTESILASLK+TVLGAPEVLLGILPGAGGTQR
I3LTZ8	1	Phenazine biosynthesis-like domain-containing protein	30.1	5	AEDGIILDLPLYPAQPQDFPEVEDLIK+MKLPIFIADAFTAK+RAEDGIILDLPLYPAQPQDFPEVEDLIK+TAIGDTLVQDVR+YFAPWVGVAEDPVTGSAHTVLSSYWSQQLGK
F1S1B9	1	Dehydrogenase reductase sdr family member 11	29.8	4	AEDVAEAVIYVLSTPPHVQIGDIQMRPTEQVT+ATCISPGVVETQFAFK+CDLSNEEDILSMFSAIR+YAVTALTEGLR
A0A1S3IBE3	1	Bifunctional ATP-dependent dihydroxyacetone kinase/FAD-AMP lyase (cyclizing) isoform X1	36	14	AEGIPVEMVVVGDDSAFTVLK+AEGIPVEMVVVGDDSAFTVLKK+AILEVLQSQGA+KLVNSVAGCADDALAGLVACNPSLQLLQGHR+LDQPDPGAVAAAAILR+LIDAETTAAAWPNVAK+LSLLLLEK+LVNSVAGCADDALAGLVACNPSLQLLQGHR+MGGSSGALYGLFLTAAAQPLK+SPGANLLPVLTK+TDLAAWSAAMDAGLEAMQK+TMLDSLWAAGQELQAWK+VAGALAEAGVGLEEITNR+VCTTLLGLEDQLNALDR
I3LDY2	1	Isopentenyl-diphosphate Delta-isomerase 1 isoform X2	28.2	5	AELGIPLEEVPPEEINYLTR+AFSVFLFNTENK+AQSDGIWGEHEIDYILLMK+LKAELGIPLEEVPPEEINYLTR+VTPWFQMIADR
F1S3H1	1	Methylmalonate-semialdehyde dehydrogenase [acylating], mitochondrial isoform X1	46	15	AEMDAAVSSCKR+AFPAWADTSILSR+EEIFGPVLVVLETDTLDEAIK+EGASILLDGR+GLQVVEHACSVTSLMLGETMPSITK+KYSHLVDVGQVGVNVPIPVPLPMFSFTGSR+LLQDSGAPDGTLNVIHGQHEAVNFICDHPDIK+NHGVVMPDANKENTLNQLVGAAFGAAGQR+QGIQFYTQLK+SDKWIDIHNPATNELIGR+TLADAEGDVFR+VNAGDQPGADLGPLISPQAK+WIDIHNPATNELIGR+WLPELVER+YSHLVDVGQVGVNVPIPVPLPMFSFTGSR
F1RJH8	1	Argininosuccinate lyase	26.5	9	AEMDQILHGLDK+AEMDQILHGLDKVAEEWAQGTFK+DLQEDKEAVFEVSDTMSAVLQVATGVISTLQVR+ENMAQALSPDMLATDLAYYLVR+FNASIAYDR+INVLPLGSGAIAGNPLGVDR+INVLPLGSGAIAGNPLGVDRELLR+MAEDLILYGTK+RENMAQALSPDMLATDLAYYLVR
P50441	1	Glycine amidinotransferase, mitochondrial	31	10	AENACVPPFTVEVK+AGWTIVTPPIPVIPDDHPLWMSSK+AVAEIEEMCNILK+DCPVSSYNEWDPLEEVIVGR+DLFAQR+FVTTEFEPCFDAADFIR+HLAPDYR+LGISTIK+WTTAPKPTMADELYDQDYPIYSVEDR+YKTPDFESTGLYGAMPR
F1S0Z3	1	Microsomal triglyceride transfer protein large subunit	19.5	10	AENKDILPQLVDAVTSAQTPDSLDAILDFLDFK+GLASLFQMQLSSGTTNEVDISGDCK+IEDSFVVAVLAEEIHALR+LPEGIPLLLK+NILLSIGELPK+TTAAAVILNNNPSYMEVK+VVFAPEPESSSSGWF+YAEAAEGPISHLAVTTLQR+YSTEVFLDR+YTAIPIVGQVFQSECK
Q59G10	1	Aldehyde dehydrogenase 1 family, member L1	65.3	41	AEQDGVPVFK+AGLLLFGNDDQMLLVK+ANATEFGLASGVFTR+DLGEAALNEYLR+ECDVLPDDTVNTLYSR+EESFGPIMIISR+EGATLVCGGNQVPRPGFFFEPTVFTDVEDHMFIAR+FADGDMDTVLSR+FAELTLK+FLFPEGVK+GMDNSALELTEEELATAEAVR+GMVQAVR+GQALPDVVAK+GVVNILPGSGSLVGQR+IAVIGQSLFGQEVYNHLK+IAVIGQSLFGQEVYNHLKEEGHK+IGNPLDRDTNHGPQNHQAHLR+ILPSVPEVDDSTDFFK+INWEQPAEAIHNWIR+IQGSTIPINQARPNR+ISDHPDVR+KLVEYCQR+LADLMEQHQEELATIEALDAGAVYTLALK+LFVENSIHDQFVQK+LIAEGK+LPQP…
I3LJ48	1	Enoyl-CoA hydratase and 3-hydroxyacyl CoA dehydrogenase	75.5	17	AFAAGADIK+ALNALCK+AQFGQPEILLGTIPGTGGTQR+EGMTAFVEK+EMQNQTFQDCYSGGFLSHWDHLSR+ESVNAAFETSLAEGLK+ESVNAAFETSLAEGLKLEK+GLILELNQALQAFEEDPAVGAIVLTGGEK+IFPVETLVEEAIQCAEK+IVTAMAK+KLFYSTFATEDRK+KPVIAAVNGYALGGGCELAMMCDIIYAGEK+LFYSTFATEDR+QAGLVSK+SLTMEMVLTGDR+SSNVGLIQLNRPK+VRKPVIAAVNGYALGGGCELAMMCDIIYAGEK
F1RNR6	1	4-hydroxyphenylpyruvate dioxygenase	43	14	AFEEEQELR+CGLEIIDHIVGNQPDQEMESASQWYMR+ESIDVLEELK+EVVSHVVK+FWSVDDTQIHTEYSALR+GVEFLAVPFTYYK+IGFEPLAYK+MPINEPAPGK+NLQFHR+NNHQGFGAGNFNSLFK+SQIQEYVDYNGGAGVQHIALK+SVVMANYEESIK+TEDIITAIR+VKESIDVLEELK
F1S232	1	4-trimethylaminobutyraldehyde dehydrogenase	32.4	19	AFEPATGR+ANDTTFGLAAGVFTR+EEIFGPVMSILSFDTEAEVVER+EILDKFTEEVVK+EVNLAVQDAK+GIKPVTLELGGK+IGDPLLEDTR+IKIGDPLLEDTR+ILGFVK+ILLEAAR+ISFTGSVPTGSK+SPLIIFSDCDMGNAVK+TVCVEMGDVESVF+VDPVDASGTEK+VIATFTCSGEKEVNLAVQDAK+VLCGGDLYVPEDPK+VLCGGDLYVPEDPKLK+VTIEYYSQLK+VTLELGGK
I3LBU0	1	UDP-glucuronosyltransferase	14.1	3	AFITHGGTNGIYEAIYHGVPMVGIPLFADQPDNIAHMTAK+ANIIASALAQIPQK+QVINNPFYK
F1RIF3	1	Fumarylacetoacetase	51.6	14	AFLQNLLSASQAR+AFTSQASATMHLPAAIGDYTDFYSSR+AIELGNGQTR+ASSVVVSGTPIR+DIQKWEYVPLGPFLGK+ETALMPNWLHLPVAYHGR+FLLDGDEVIITGHCQGDGYR+HLFTGPVLSK+HQDVFDQPTLNSFMGLGQAAWK+IGVAIGDQILDLSVIK+LGEPIPISK+SFGTTISPWVVPMDALMPFAVPNPEQDPKPLPYLR+VGFGQCTGK+WEYVPLGPFLGK
O46658	1	Vitamin D(3) 25-hydroxylase	50.9	20	AFLVMIDELITEHK+AVSNVIASLTFAR+DLAQPPRDLTDAFLDEMK+DLTDAFLDEMK+DLTDAFLDEMKEAK+DQALMPFTLAVLHEVQR+EALVSHSHETSDRPPVFILEHLGYGPR+FGDIVPLGVAHMTSCDIEVQGFLIPK+FSVSTLR+FYPEHFLDAQGR+GNPESSFNDENLR+GTTLITNLTSVLKDETVWK+LLDLVLEGLKEEVGLMR+LSFIQLR+QPEIKDQALMPFTLAVLHEVQR+QVLEAMPVLR+SEGVILAR+SLEEWVTQEASCLCAAFADQAGRPFSPNNLLNK+VQQEIDEVIGHVR+YPPGPMPLPGLGNLLQVNFQDPR
Q9N1F5	1	Glutathione S-transferase omega-1	61.1	13	AFNDLYLQNSPEACDYGL+DPAVSALHIEPR+EFSKLEEVLTK+FCPFAQR+GSAPPGPVPEGLIR+LEALELNECIDHTPK+LLPDDPYEK+LWMAAMMKDPAVSALHIEPR+MVFELSSK+NPSGLVPVLENSQGQLIYESAITCEYLDEAYPGK+NPSGLVPVLENSQGQLIYESAITCEYLDEAYPGKK+TLLVLNAK+VPPLLIR
Q9Y2P5	1	Bile acyl-CoA synthetase-like	55.8	4	AFQPLTPDIYQAVCEGTWR+AFQPLTPDIYQAVCEGTWRL+EGFNVGVVADPLFVLDHQAR+NWLPAYAAPHFIR
P40125	1	Adenylyl cyclase-associated protein 1	24.3	2	AGAAPYVQAFDSLLAGPVAEYLK+LSELLAPISEQIQEVITFR
E7D6R3	1	Betaine homocysteine methyltransferase-2	34.4	8	AGASIIGVNCR+AGLWTPEAVVEHPNAVR+AGSNVMQTFTFSANEDNMESQWEAVNAAACDLAQEVAGK+AIAEELAPER+EGLQAAGLK+GFLPPASEK+GGFVDLPEYPFALEPR+YIGGCCGFEPYHIR
E7D6R2	1	Betaine homocysteine methyltransferase	74.1	21	AGASIVGVNCHFDPTISLQTVK+AGPWTPEAAVEHPEAVR+AGSNVMQTFTFYASEDKLENR+AHLMSQPLAYHTPDCGK+AIAEELAPER+ASGKPVAATMCIGPEGDLHGVTPGQCAVR+EATTEQQLR+EAYNLGVR+EGLQAAGLK+ELFEK+EYWENLR+GFLPPASEK+GNYVAEK+GTAELMQQK+LNSGEVVIGDGGFVFALEK+NVDFLIAEYFEHVEEAVWAVEALK+QGFIDLPEFPFGLEPR+QQLEVFMK+QVADEGDALVAGGVSQTPSYLSCK+VNEAACDIAR+YIGGCCGFEPYHIR
Q6UAQ8	1	Electron transfer flavoprotein subunit beta	34.1	8	AGDLGVDLTSK+GIHVEVPAAEAHHLGPLQVAR+HSMNPFCEIAVEEAVR+LKLPAVVTADLR+LSVVSVEDPPQR+TALAMGADR+VDLVLLGK+VIDFAVK
Q6QAQ1	1	Actin, cytoplasmic 1	69.9	24	AGFAGDDAPR+AVFPSIVGRPR+CDVDIRK+CPEALFQPSFLGMESCGIHETTFNSIMK+DLTDYLMK+DLYANTVLSGGTTMYPGIADR+DSYVGDEAQSKR+EITALAPSTMK+FRCPEALFQPSFLGMESCGIHETTFNSIMK+GILTLK+GYSFTTTAER+HQGVMVGMGQK+IIAPPER+IIAPPERK+ILTER+IWHHTFYNELR+KDLYANTVLSGGTTMYPGIADR+LCYVALDFEQEMATAASSSSLEK+LDIAGR+QEYDESGPSIVHR+QEYDESGPSIVHRK+SYELPDGQVITIGNER+TTGIVMDSGDGVTHTVPIYEGYALPHAILR+VAPEEHPVLLTEAPLNPK
P68137	1	Actin, alpha skeletal muscle	47.3	16	AGFAGDDAPR+AVFPSIVGRPR+DLTDYLMK+DSYVGDEAQSKR+EITALAPSTMK+GILTLK+HQGVMVGMGQK+IIAPPER+IIAPPERK+ILTER+IWHHTFYNELR+LCYVALDFENEMATAASSSSLEK+LDIAGR+SYELPDGQVITIGNER+TTGIVLDSGDGVTHNVPIYEGYALPHAIMR+YPIEHGIITNWDDMEK
P00636	1	Fructose-1,6-bisphosphatase 1	48.8	11	AGIAHLYGIAGSTNVTGDQVK+AISTAVR+APIILGSPEDVTELLEIYQK+EAVLDIVPTDIHQR+EFDPAITEYIQR+GSIYSINEGYAK+GTGEMTQLLNSLCTAVK+KLDVLSNDLVINVLK+LLYECNPMAYVMEK+NSTDEPSEKDALQPGR+SSFATCVLVSEEDKNAIIVEPEKR
Q8CGP5	1	Histone H2A type 1-F	32	8	AGLQFPVGR+DAVTYTEHAK+DNIQGITKPAIR+ISGLIYEETR+TVTAMDVVYALK+TVTAMDVVYALKR+VFLENVIR+VTIAQGGVLPNIQAVLLPK
F1SEN2	1	Glutamate dehydrogenase mitochondrial	62.2	28	AGPAALGSAAADSAALLGR+ALASLMTYK+CAVVDVPFGGAK+CVGVGESDGSIWNPDGIDPK+DDGSWEVIEGYR+DIVHSGLAYTMER+DSNYHLLMSVQESLER+ELEDFKLQHGTILGFPK+FTMELAK+GASIVEDK+GASIVEDKLVEDLK+GFIGPGIDVPAPDMSTGER+GVFHGIENFINEASYMSILGMTPGFGDK+HGGTIPIVPTAEFQDR+IIAEGANGPTTPEADKIFLER+IIKPCNHVLSLSFPIR+IIKPCNHVLSLSFPIRR+ISGASEKDIVHSGLAYTMER+IYEGSILEADCDILIPAASEK+KGFIGPGIDVPAPDMSTGER+MVEGFFDR+NYTDNELEK+RFTMELAK+SEAAADREDDPNFFK+TAAYVNAIEK…
Q9BYV1	1	Alanine--glyoxylate aminotransferase 2	42.7	14	AGPSLNGAFWTSVTK+DQYIEQFKDTLSTSVAK+EVGTYLLLK+GGVCIADEVQTGFGR+GIGNGFPMAAVVTSPEIAESLAK+IAPSMCITKPEVDFAVEVFR+LGSHFWGFQTHDVLPDIVTMAK+LNAAAQTQLGR+LRDEFDIVGDVR+LSALLPEPLK+QPLPLEEVNQILMDCK+SIAGFFAEPIQGVSGVVQYPK+VIFLVNSGSEANDLAMLMAR+YQSIAYSR
F1SN27	1	Sorbitol dehydrogenase	52	14	AGVTLGNK+ALEAFETSK+ALEAFETSKK+AMGAAQVVVSDLSAAR+HNSNFCYK+KPMVLGHEASGTVVK+LENYPIPEPGPNEVLLK+LPDNVTFEEGALIEPLSVGIHACR+SVNVKPLVTHR+VAIEPGAPR+VFVCGAGPIGLVSLLVAK+VGSLVTHLKPGDR+YCNTWPMAISMLASK+YNLSPTIFFCATPPDDGNLCR
F1SLA0	1	ATP synthase subunit beta	56.2	17	AIAELGIYPAVDPLDSTSR+DQEGQDVLLFIDNIFR+EGNDLYHEMIESGVINLK+FLSQPFQVAEVFTGHLGK+FTQAGSEVSALLGR+GFQQILAGEYDHLPEQAFYMVGPIEEAVAK+IMDPNIVGSEHYDVAR+IMNVIGEPIDER+IPSAVGYQPTLATDMGTMQER+KGSITSVQAIYVPADDLTDPAPATTFAHLDATTVLSR+LVLEVAQHLGESTVR+SLQDIIAILGMDELSEEDKLTVSR+TREGNDLYHEMIESGVINLK+TVLIMELINNVAK+VALTGLTVAEYFR+VLDSGAPIKIPVGPETLGR+VVDLLAPYAK
P11498	1	Pyruvate carboxylase, mitochondrial	17.1	10	AIAIAAGVPVVPGTDAPITSLHEAHEFSNTYGFPIIFK+ALAISDLNR+ANPSPTDPVVPVVPIGPPPAGFR+ELIPNIPFQMLLR+GLAPVQAYLHIPDIIK+HGEEVTPEDVLSAAMYPDVFAHFK+LDNASAFQGAVISPHYDSLLVK+SVVEFLQGYIGTPHGGFPEPLR+VEGRPGASLPPLDLQALEK+VVEIAPAAHLDPQLR
P03974	1	Transitional endoplasmic reticulum ATPase	29.8	13	AIANECQANFISIK+AVANETGAFFFLINGPEIMSK+DVDLEFLAK+ETVVEVPQVTWEDIGGLEDVKR+IVSQLLTLMDGLK+KKMDLIDLEDETIDAEVMNSLAVTMDDFR+LADDVDLEQVANETHGHVGADLAALCSEAALQAIR+LDQLIYIPLPDEK+LIVDEAINEDNSVVSLSQPK+NAPAIIFIDELDAIAPK+NAPAIIFIDELDAIAPKR+QAAPCVLFFDELDSIAK+VINQILTEMDGMSTK
I3LVF1	1	Hydroxyacid oxidase 1	24.6	5	AIDPSISWEDIK+ENFGDNSGLAAYVAK+GVQDVLEILKEEFR+QLDGVPATIDALPEIVEAVEGK+TLGTGMMLSSWATSSIEEVAEAGPEALR
F1RMF8	1	Glycine N-acyltransferase	60.7	10	AIDQEQFQLSSLEPSHAALVNQLWQFGGNER+AQGLVTYVIFSHSQVLTK+LGFPSYSHVDKR+MFLLQGAQMLQMLENSLRK+MPCSWNQWNCVPL+NCEEFLGLPEVINWK+NFPSVCLLGPEGTPIAWSLMDQTGEMR+SFNVQQTENILYMTLETIK+SFNVQQTENILYMTLETIKELAPSLLDEK+VYGTVFHMNQGNPFK
F1RSZ3	1	Long-chain-fatty-acid-- ligase 1	29.9	16	AILEDMLR+ALKPPCDLAMQSVEVAGSDGAR+ALQPTIFPVVPR+ANLLLEGVENK+GFVGSFEELCR+GISLHPELFSIDNGLLTPTMK+IGFFQGDIR+KPDQPYEWLSYK+LAQGEYIAPEKIENIYIR+LMVTGAAPVSATVLTFLR+LVDVEEMNYLAAK+MPELVDFQQYVR+SAILDSDEPLAYFYDDVR+SQIDELYSTVKV+TFSPSSDDTLISFLPLAHMFER+TLYEGFQR
F1S7D2	1	Glutathione S-transferase (Fragment)	82.3	7	AILNYIATK+ALIDMYTEGVADLGEMILLLPLCPPNEK+ALIDMYTEGVADLGEMILLLPLCPPNEKDAK+ALIDMYTEGVADLGEMILLLPLCPPNEKDAKVASIK+LSQDGSLLFQQVPMVEIDGMK+YLPAFEK+YNLYGK
F1S0R9	1	Sarcosine mitochondrial	10.1	4	AILQEVLDADLSNEAFPFSTHK+ALYPLMNVDDLYGTLYVPHDGTMDPAGTCTTLSR+HWHADLRPDDSPLEAGLAFTCK+NYSIVFPHDEPLAGR
Q767L7	1	Tubulin beta chain	33.1	10	AILVDLEPGTMDSVR+ALTVPELTQQVFDAK+GHYTEGAELVDSVLDVVR+GHYTEGAELVDSVLDVVRK+IMNTFSVVPSPK+LAVNMVPFPR+LHFFMPGFAPLTSR+LTTPTYGDLNHLVSATMSGVTTCLR+NSSYFVEWIPNNVK+SGPFGQIFRPDNFVFGQSGAGNNWAK
F1RF14	1	Isoform 2 of liver carboxylesterase 1	39.2	10	AISESGVAFTAGLVR+FAPPQPAEPWSFVK+LGIWGFFSTGDEHSR+LIPEFSEDCLYLNIYTPADLTK+NLFHR+QIAVLAGCK+QKSEDELLDLTLK+SEDELLDLTLK+TTTSAVFVHCLR+YVSLEGLAQPVAVFLGVPFAKPPLGSLR
Q29550	1	Liver carboxylesterase precursor	60.2	27	AISESGVALTAGLVR+DAGAPTYMYEFQYRPSFSSDK+DAGAPTYMYEFQYRPSFSSDKKPK+DFNTVPYIVGINK+DLFLDLMGDVVFGVPSVTVAR+ESHPFLPTVVDGVLLPK+FAPPQPAEPWSFVK+FWANFAR+GDAPEEEVSLSK+GEEVAFWNDLLSK+LGIWGFFSTGDEHSR+LKGEEVAFWNDLLSK+MPEEILAEKDFNTVPYIVGINK+NLFHR+QEFGWLLPTMMGFPLSEGK+QEFGWLLPTMMGFPLSEGKLDQK+QIAVLAGCK+QKSEDELLDLTLK+SEDELLDLTLK+SFPITNIPEELTPVATDK+SGNPNGEGLPHWPMYDQEEGYLQIGVNTQAAK+TATSLLWK+TTTSAVFVHCLR+TVIGDHGDEIFSVFGFP…
Q29550	1	Liver carboxylesterase	56.1	30	AISESGVALTVALVR+DAGAPTYMYEFQYRPSFSSDK+DAGAPTYMYEFQYRPSFSSDKKPK+DFNTVPYIVGINK+DLFLDLMGDVVFGVPSVTVAR+ESHPFLPTVVDGVLLPK+FAPPQPAEPWSFVK+FLTLDFHGDQR+FWANFAR+GDAPEEEVSLSK+GEEVAFWNDLLSK+LGIWGFFSTGDEHSR+LKGEEVAFWNDLLSK+LTLEFSEDCLYLNIYTPADLTK+MPEEILAEKDFNTVPYIVGINK+NLFHR+QEFGWLLPTMMGFPLSEGK+QEFGWLLPTMMGFPLSEGKLDQK+QIAVLAGCK+QKSEDELLDLTLK+SEDELLDLTLK+SGNPNGEGLPHWPMYDQEEGYLQIGVNTQAAK+SYPIANIPEELTPVATDK+SYPI…
P00355	1	Glyceraldehyde-3-phosphate dehydrogenase	43.9	14	AITIFQERDPANIK+GAAQNIIPASTGAAK+IVSNASCTTNCLAPLAK+LISWYDNEFGYSNR+LTGMAFR+LVINGK+QASEGPLK+RVIISAPSADAPMFVMGVNHEK+VGVNGFGR+VIHDHFGIVEGLMTTVHAITATQK+VIISAPSADAPMFVMGVNHEK+VIISAPSADAPMFVMGVNHEKYDNSLK+VPTPNVSVVDLTCR+WGDAGATYVVESTGVFTTMEK
F1RRB7	1	3-ketoacyl- peroxisomal	51.4	13	AKELGLPILGILR+DCLIPMGITSENVAK+DTTPDELLSAVMTAVLQDVK+ELGLPILGILR+GCFQAEIVPVTTTVYDDKGNEK+GGFKDTTPDELLSAVMTAVLQDVK+IAQFLSDIPETVPLSTVNR+LSPAQLGDICVGNVLQPGAGAVMAR+QGGSTTAGNSSQVSDGAAALLLAR+QVITLLNELK+SITVAQDEGIRPNTTMEGLAK+SYAVVGVPPDIMGIGPAYAIPVALEK+VNPLGGAVALGHPLGCTGAR
F1RS36	1	78 kDa glucose-regulated protein	28.5	13	AKFEELNMDLFR+DAGTIAGLNVMR+DNHLLGTFDLTGIPPAPR+ELEEIVQPIISK+IEWLESHQDADIEDFKAK+IINEPTAAAIAYGLDKR+ITPSYVAFTPEGER+LTPEEIER+NELESYAYSLK+SQIFSTASDNQPTVTIK+TFAPEEISAMVLTK+VEIIANDQGNR+VTHAVVTVPAYFNDAQR
F1RW28	1	17-beta-hydroxysteroid dehydrogenase 13	50.4	10	ALAAINR+ALTAELEAVGK+EVGDITIVVNNAGTIYPADLLSTKDEEITK+FAAVGFHR+LVLWDINK+LWPILETDEVAR+SLIDGILTNK+SVAGEIVLVTGAGHGIGR+TFEVNILGHFWITK+TSCLCPVFVNTGFTK
F1RYY6	1	Transaldolase	14.8	3	ALAGCDFLTISPQLLGELLK+ALAGCDFLTISPQLLGELLKDTSK+LGGSQEEQVTNAVDKLFVLFGAEILK
F1SSB5	1	Fructose-bisphosphate aldolase	78.2	14	ALANCQAAK+ALNDHHVYLEGTLLKPNMVTAGHACTK+ALQASALAAWGGK+ATQEAFMK+DGVDFGK+ETTIQGLDGLSER+IDKQCPSHLAIQENANALAR+KYTPEQVAMATVTALYR+LSFSYGR+QCPSHLAIQENANALAR+TVPAAVPGICFLSGGMSEEDATLNLNAINLCPLPKPWK+VLAAVYK+YASICQQNGLVPIVEPEVIPDGDHDMEHCQYVTEK+YTPEQVAMATVTALYR
F1RMH5	1	Urocanate hydratase	27.5	11	ALCSGLPLRPLPENR+APVVLSR+EALSLGYHGNVVDLWER+ETSNIHDGSAFCADMAVQNFVGDAFR+LQYMDNIR+TPGLSPTEEQLALR+VFVTSGLGGMSGAQAK+WVCTSGDPQDLAVTDHLATSVLEEAISGGVNPAVK+YFPPDVQEQLAPEFAQELR+YLGVEDLAGK+YQQGWLMEVTNSLDHCIER
E1CAJ6	1	Protein disulfide isomerase P5	33.9	9	ALDLFSDNAPPPELLEIISEDVAK+ALDLFSDNAPPPELLEIISEDVAKK+EPWDGKDGELPVEDDIDLSDVELDDLEKDEL+GSFSEQGINEFLR+GSTAPVGGGAFPAISTR+LAAVDATVNQVLASR+NSYLEVLLK+TGEAIVDAALSALR+VGAVDADKHQSLGGQYGVQGFPTIK
Q1KLB4	1	Putative aldo-keto reductase family 1 member C1	84	26	ALFDTVDLCR+DIIPVAYSALGSQR+ENLQVFNFELPPEDMK+GVVVLAK+GWVNLNHPVLLEDPVLHAIAK+HIDSAYLYQNEEQVGQAIR+IADGTVKR+IKENLQVFNFELPPEDMK+ILNKPGLK+LLDFCK+LNDGHFIPVLGFGTYAPEEVPK+LNDGHFIPVLGFGTYAPEEVPKSEALEATK+LRLNDGHFIPVLGFGTYAPEEVPK+LRLNDGHFIPVLGFGTYAPEEVPKSEALEATK+LWATFLRPELVRPALEK+NLQLDYVDLYIIHFPVALKPGEELLPTDENGK+QTSAVIALR+REDIFYTSK+SEALEATK+SIGVSNFNHQQLER+TIDGLNQNLR+TWEALEK+VKGWVNLNHPVLLEDPVLHAIAK+YAIEVGFR+YCD…
F1RYV6	1	Aldo-keto reductase family 1 member c1	83.4	25	ALFDTVDLCR+DIIPVAYSALGSQR+GVVVLAK+GWVNLNHPVLLEDPVLHAIAK+HIDSAYLYQNEEQVGQAIR+IADGTVKR+ILNKPGLK+LLDFCK+LNDGHFIPVLGFGTYAPEEVPK+LNDGHFIPVLGFGTYAPEEVPKSEALEATK+LRLNDGHFIPVLGFGTYAPEEVPK+LRLNDGHFIPVLGFGTYAPEEVPKSEALEATK+LWATFLRPELVRPALEK+NLQLDYVDLYIIHFPVALKPGEELLPTDENGK+QTSAVIALR+REDIFYTSK+SEALEATK+SIGVSNFNHQQLER+SKDIIPVAYSALGSQR+TIDGLNQNLR+TWEALEK+VKGWVNLNHPVLLEDPVLHAIAK+YAIEVGFR+YCDFSYAVGHPDYPF+YKPVCN…
P31939	1	Bifunctional purine biosynthesis protein PURH	15.4	4	ALFEEVPELLTEAEKK+DVSELTGFPEMLGGR+SGVAYIAAPSGSAADKVVIAACDELGIVLAHTNLR+TVASPDVTLEEAVEQIDIGGVTLLR
F1S2X3	1	Ethylmalonyl-CoA decarboxylase isoform X1	25	5	ALHIGIADEVLQSSDETECLR+DLLGTVWGGPANLEAVAR+EMGIIPSWGGAAR+LPLISVALVQGR+VIELENWTEGK
I3LII3	1	Elongation factor 2	14.5	6	ALLELQLEPEELYQTFQR+EGIPALDNFLDKL+GHVFEESQVAGTPMFVVK+LMEPIYLVEIQCPEQVVGGIYGVLNR+WLPAGDALLQMITIHLPSPVTAQK+YVEPIEDVPCGNIVGLVGVDQFLVK
F1S8Y5	1	Phosphoglycerate mutase 1	24.4	3	ALPFWNEEIVPQIK+HLEGLSEEAIMELNLPTGIPIVYELDK+YADLTEDQLPSCESLKDTIAR
A0A287B0Z8	1	Indolethylamine N-methyltransferase	34.4	4	ALQDAGCQVLR+CDATEPHPLGPAQVLPADCVLTLLALECACHDVDTYR+TYYTFDSGTVAENEILK+WLKEEPGAYDWSPAVQYVCELEGDR
Q0R678	1	Protein DJ-1	72	11	ALVILAK+APLVLRD+EGPYDVVVLPGGNLGAQNLSESAAVK+EGPYDVVVLPGGNLGAQNLSESAAVKDILK+EGPYDVVVLPGGNLGAQNLSESAAVKDILKEQEK+GAEEMETVIPVDVMR+GLIAAICAGPTALLAHEIGFGSK+GPGTSFEFALAIVEALAGK+GPGTSFEFALAIVEALAGKEVADQVK+VTTHPLAK+VTVAGLAGKDPVQCSR
F1RUE3	1	Succinate-semialdehyde dehydrogenase, mitochondrial	31.2	8	AMEVGEALCTDPLVSK+EETFGPLAPVIK+NFFEPTLLSNVTQEMLCSR+QPVGVAAVITPWNFPSAMITR+VAEQLEVGMVGVNEGLISSVECPFGGVK+VSMELGGHAPFIVFDSANVDQAVAGAMVSK+WLSAASTFPVYDPASGAELGLVADCGVSEAR+YGIDEYLELK
I3LP41	1	Malate dehydrogenase	57.4	16	ANAFVAELK+EGVVECSFVK+GCDVVVIPAGVPR+GYLGPEQLPDCLK+HGVYNPNK+IFGVTTLDIVR+IQEAGTEVVK+ISPFEEK+LTLYDIAHTPGVAADLSHIETR+MIAEAIPELK+NSPLVSR+SQETDCPYFSTPLLLGK+TIIPLISQCTPK+VAVLGASGGIGQPLSLLLK+VDFPQDQLSTLTGR+VSVPVIGGHAGK
S9WXR1	1	Acyl-coenzyme A amino acid N-acyltransferase 2-like	53.7	17	ANEAGELDLEQDPALGGDFVGVHPMGLFWSLKPEKPFGR+ASLEVQR+DESNQQSVFPVEK+DLVLTPIPSFPER+DYAEQALNQLQSHGR+GAEIGLAMACYLK+GLFRPLLWGGDPVLHEAAQEQAWR+GNLFQSR+MEVNASGAVR+MFQLTATPASALADEPVHIR+QNLVGSR+SGVVQPR+SKGPILFIIGGDDECFNSR+VMGLAPLQVVTLMASLK+VMGLAPLQVVTLMASLKDEK+WFSSPGVQR+YRDLVLTPIPSFPER
Q95JC8	1	Arginase-1	59.5	16	ANQQLADVVAEIK+ANQQLADVVAEIKK+DIVYIGLR+DYGDLCFADVPNDTPFQIVK+EGIYITEEIYK+EKIPEVPGLSWVTPCLSAK+GGVEEGPTALRK+IPEVPGLSWVTPCLSAK+LKEQECDVKDYGDLCFADVPNDTPFQIVK+SQSIGIIGAPFSK+TGLLSGLDIMEVNPSLGK+TGLLSGLDIMEVNPSLGKTPEEVTR+TPEEVTR+TVNTAVALVLACFGVAR+VHPDLCVIWVDAHTDINTPLTTTTGNLHGQPVSFLLK+VMEEAFSYLLGR
I3LJW4	1	Cytoplasmic aconitate hydratase	27	13	ANYLASPPLVIAYAIAGTIR+ATIANMCPEYGATAAFFPVDEVSIK+GPFLLGIK+IIPPGSGIIHQVNLEYLAR+KDDVENILNWNVLQHENIEVPFKPAR+LMGNPHPLVTSTDIVLTITK+QAPQTIHLPSGEVLDVFDAAER+QFVIPGMFK+SNLVGMGVIPLEYLPGENADTLGLTGR+SPPFFEDLTLDLQPPK+TSLSPGSGVVTYYLR+VILQDFTGVPAVVDFAAMR+YQQAGLPLIILAGK
F1S9I9	1	Mitochondrial amidoxime reducing component 2	19	5	APGMDQLVLPIKVPSSNR+DCGDEAAQWFTSFLK+GVPVSEAECTALGLR+LWLYPVK+MFGLDTQGR
B3CL06	1	Serotransferrin	43.2	22	APNHAVVAR+AVASFFSSSCVPCADPVNFPK+CGLVPVLAENYK+DDKVTCVAEELLK+DLLFRDDTQCLAR+FDQFFGEGCAPGSQR+HSTVLENLPDKADRDQYELLCR+IECVSAENTEDCIAK+LLEACTFHSAK+QMDFELLCQNGAREPVDNAENCHLAR+QQAQFGR+RPVDDYENCYLAQVPSHAVVAR+SAGWIIPMGLLYDQLPEPR+SCHTGLGR+SSGPDLNWNNLK+SSYLDCIK+SVDGQEDSIWELLNQAQEHFGR+TAGWNIPMGLLYNK+TTYESYLGADYITAVANLR+TTYESYLGADYITAVANLRK+WCTISNQEANK+YYGYTGAFR
F1S0X9	1	Argininosuccinate synthase	68	24	APNSPDILEIEFK+APNSPDILEIEFKK+EFVEEFIWPAIQSSAMYEDR+EQGYDVIAYLANIGQK+EQGYDVIAYLANIGQKEDFEEAR+ESPLSLYNEELVSMNVQGDYEPVDATGFININSLR+FAELVYTGFWHSPECEFVR+FELSCYSLAPQIK+GIYETPAGTILYHAHLDIEAFTMDR+GQVYILGR+IDIVENR+KQVEIAQR+MPEFYNR+NDLMEYAK+NPWSMDENLMHISYEAGILENPK+NPWSMDENLMHISYEAGILENPKNQAPPGLYTK+NQAPPGLYTK+QHGIPIPVTPK+STALELFVYLNEVAGK+TQDPAKAPNSPDILEIEFK+TQDPAKAPNSPDILEIEFKK+VIAPWR+VQVSVFK+YLLGTSLARPCIAR
P00503	1	Aspartate aminotransferase, cytoplasmic	44.6	11	APPSVFAEVPQAQPVLVFK+FLFPFFDSAYQGFASGNLEK+IANDSSLNHEYLPILGLAEFR+IGAEFLAR+NLDYVATSIHEAVTK+QVEYLINEK+TDDCQPWVLPVVR+TLSDPELFHEWTGNVK+TPGTWNHITDQIGMFSFTGLNPK+VGGVQSLGGTGALR+VGNLTVVAKEPDSILR
F1SGG1	1	keratin, type I cytoskeletal 18, partial	48.5	13	AQIFASSVDNAR+AQYDELAQK+GGSGWGAGMAGGLVGVGGIQGEKETMQDLNDR+GLQNQIANSGLTVELDAPKPQDLSK+IVLQIDNAR+LAADDFR+LLEDGEDFNLGDALDSSNSR+LQLETEIEALKEELLFMK+LQLETEIEALKEELLFMKK+QTQEYEALLNIK+TVQSLEIDLDSMR+VIDDTNVTR+YALQMEQLNGVLLHLESELAQTR
F1SGG2	1	Keratin, type II cytoskeletal 8 isoform X2	38.2	15	AQYEEIANR+ASLEAAIADAEQR+ASLEAAIADAEQRGELAVK+EYQELMNVK+FASFIDK+GGLGSGMSLVGGYGGPSGLGGITAVTVNQSLLSPLKLEVDPNIQAVR+HGDDLRR+ISSSAFSR+LEGLTDEINFYR+LVSESSDVLSK+QLETLAQEK+SLDLDGIIAEVK+SNIDNMFESYINNLRR+TDMENEFVIIK+YEELQSLAGK
P0DMV8	1	Heat shock 70kDa protein 8	15	7	ARFEELNADLFR+DAGTIAGLNVLR+IINEPTAAAIAYGLDKK+SFYPEEVSSMVLTK+TTPSYVAFTDTER+TVTNAVVTVPAYFNDSQR+VEIIANDQGNR
Q9GKX6	1	Aldose 1-epimerase	8.7	2	ASDVVLGFAELK+VLEVYTTQPGIQFYTGNFLDGTLK
Q29073	1	Prostaglandin reductase 1	38	6	ASPEGYDCYFDNVGGEFSNAVTSQMK+EGDMMMGEQVAR+GGETVMVNAAAGAVGSVVGQIAK+HFVGYPTPSNFELK+IQYHEHITEGFENMPAAFMGMLK+NAAFPTGTIVVALLGWTTHSISDGK
F1RJH2	1	Short-chain-specific acyl-CoA dehydrogenase, mitochondrial	34.5	8	ASSTANLIFEDCRIPK+ENLLGEPGMGFK+GISAFLVPMPTPGLTLGK+IAMQTLDMGR+IGIASQALGIAQAALDCAVNYAENR+LAASEAATAITHQAMQILGGMGYVTEMPAER+LADMALALESAR+LHTIFQSVELPETYQMLR
F1SED0	1	Short/branched chain specific acyl-CoA dehydrogenase, mitochondrial	53.6	14	ASSTCPVTLENAK+FAQEQIAPLVSK+GITCFLVDRDTEGLR+IFDFQGLQHQVAHTATQLEAAR+IGTIYEGTSNIQLNTIAK+LATEQLGSFCLSEPSAGSDSFSLK+LLTYNAAR+SVIEGLFQQGLMGIETEPK+TTNNGLSYSPLQTFTDEEMMIK+VDASVALVCDLQNTVINDLIGR+VPEANIVGQIGHGYK+YAIQSLNK+YGGTGASFFSSVLVIEELAK+YYASEVAIQTTNK
F1RXF3	1	2,4-dienoyl- mitochondrial	24.1	5	ATAEEISSQTGNK+EQWDTIEGLIR+FNVIQPGPIK+VHAIQCDVRDPNMVQNTVSELIK+VIGHPDIVINNAAGNFISPTER
P10173	1	Fumarate hydratase	20.7	4	ATAVELGYLTAEQFDEWVKPK+SGLGELILPENEPGSSIMPGK+THTQDAVPLTLGQEFSGYVQQVK+VAALTGLPFVTAPNKFEALAAHDALVELSGAMNTTACSLMK
I3LDC7	1	Isocitrate dehydrogenase [NADP]	42.5	15	ATDFVVPGPGK+FKDIFQEIYDK+GQETSTNPIASIFAWTR+GWPLYLSTK+IIWELIK+LIDDMVAQAMK+LIFPYVELDLHSYDLGIENR+LVSGWVKPIIIGR+NILGGTVFR+SDYLNTFEFMDK+SDYLNTFEFMDKLGENLK+SIEDFAHSSFQMALSK+SPNGTIRNILGGTVFREAIICK+TVEAEAAHGTVTR+VEISYTPR
I3LLH8	1	Eenoyl- delta isomerase mitochondrial	32	2	ATEQALQLGSLLPPAEALQVGMVDQVVPEDQLLSTALSVMAK+DADIQNFVSFISK
A0A1U7TSE3	1	Alpha/beta hydrolase domain-containing protein 14B isoform X3	45.5	6	AVAIDLPGLGR+FSSETWQNLGTLHR+GYVPVAPICTDKINAADYAR+INAADYAR+TSVLIVYGDQDPMGQTSFEHLK+VLVMEGAGHPCYLDKPEQWHTGLLDFLK
I3LDH7	1	Formimidoyltransferase-cyclodeaminase	40.5	11	AVAQTPGCVLLDVDSGPSTNR+EAQELSLPVVGSQLVGLVPLK+IIEYLVPEAGPEQSLLHKPLR+LAEELGVPVYLYGEAAR+LGLDSLAPFKPK+MGALDVCPFIPVR+NLAQVSTNLLDFEVTGLHTVFEETCR+QAEWAPDFGPSAFVPSWGATVAGAR+SAAPGGGSVAAATAAMGAALASMVGLMTYGR+TVYTFVGRPEDVVEGALNAAR+VQAIGWYLDEK
Q2XVP4	1	Tubulin alpha-1B chain	31.2	8	AVCMLSNTTAIAEAWAR+AVFVDLEPTVIDEVR+EIIDLVLDR+FDGALNVDLTEFQTNLVPYPR+IHFPLATYAPVISAEK+SIQFVDWCPTGFK+TIGGGDDSFNTFFSETGAGK+VGINYQPPTVVPGGDLAK
P04178	1	Superoxide dismutase [Cu-Zn]	84.3	10	AVCVLK+DGVATVYIEDSVIALSGDHSIIGR+GDGPVQGTIYFELK+GDGPVQGTIYFELKGEK+GLAEGDHGFHVHQFGDNTQGCTSAGPHFNPESK+HVGDLGNVTAGK+HVGDLGNVTAGKDGVATVYIEDSVIALSGDHSIIGR+LACGVIGITQ+TMVVHEKPDDLGR+TVLVTGTIK
F1SLX2	1	Alpha-2-macroglobulin	7.5	6	AVDQSVLLLKPEAELSPTTVYNLLPVK+GSFSLSFPVEADLAPIAR+QLSFPLSSEPFQGSYK+TPQIITILEK+VSVHLMDSPAFLAVPEEKEEK+VVLLDENFHPLNK
F1RPS8	1	ATP synthase subunit alpha (Fragment)	37	14	AVDSLVPIGR+EAYPGDVFYLHSR+EPMQTGIK+EVAAFAQFGSDLDAATQQLLSR+FENAFLSHVISQHQALLGK+GMSLNLEPDNVGVVVFGNDK+LELAQYR+LKEIVTNFLAGFEA+QGQYAPMAIEEQVAVIYAGVR+TGAIVDVPVGEELLGR+TGTAEVSSILEER+TSIAIDTIINQK+VLSIGDGIAR+VVDALGNAIDGK
P22307	1	Non-specific lipid-transfer protein	9.8	4	AVEIVAQEMITDLPSSFEENSMIK+IGGIFAFK+LQNLQLQPSK+MNPQLAFFQGK
A8U4R4	1	Transketolase	39.5	13	AVELAANTK+ESWHGKPLPQNMADQVIQEIYSQIQNK+GHAAPILYSVWAEAGFLPEAELLNLR+GITGVEDKESWHGKPLPQNMADQVIQEIYSQIQNK+ILATPPQEDAPSVDITNIR+ILTVEDHYYEGGLGEAVAAAVVGEPDVTVTR+LDNLVAILDINR+NQPTAIIAK+QAFTDVATGSLGQGLGAACGMAYTGK+SKDDQVTVIGAGVTLHEALAAADLLKK+SVPMSTVFYPSDGVATEK+TSRPENAIIYNNNEDFQIGQAK+VLDPFTVKPLDR
P01965	1	Hemoglobin subunit alpha	91.5	12	AVGHLDDLPGALSALSDLHAHK+FLANVSTVLTSK+LLSHCLLVTLAAHHPDDFNPSVHASLDK+LRVDPVNFK+MFLGFPTTK+TYFPHFNLSHGSDQVK+VADALTK+VDPVNFK+VGGQAGAHGAEALER+VGGQAGAHGAEALERMFLGFPTTKTYFPHFNLSHGSDQVK+VLSAADK+VLSAADKANVK
P49924	1	Fatty acid-binding protein, liver	82.8	11	AVGLPDELIQK+GTSEIVQNGK+LTITTGSK+LVTTFK+SVTELNGDIITSTMTLGDIVFK+SVTELNGDIITSTMTLGDIVFKR+TVVQLEGDNK+TVVQLEGDNKLVTTFK+VVQNEFTLGEECEMETLTGEK+VVQNEFTLGEECEMETLTGEKVK+YQVQSQENFEAFMK
Q19QT7	1	Cystathionine gamma-lyase	26	6	AVVPPISLSTTFK+FLQNSLGAVPSPIDCYLCNR+HFENGMAVAQFLESHPLVEK+LFTLAESLGGYESLAELPAIMTHSSVPK+LSVGLEDKQDLMDDLDQALK+LVWIETPTNPILK
F1RHN3	1	Catechol O-methyltransferase	76.3	17	AVYKGPGSPAQP+FECTHFSSYLEYSQMVDGLEK+GQIVDTVVQEQRPSVLLELGAYCGYSAVR+GTVLLADNVICPGAPDFLAHVR+ILQYVLQHAVAGDPESVLDTIDTYSSQK+ILQYVLQHAVAGDPESVLDTIDTYSSQKEWAMHVGR+KGTVLLADNVICPGAPDFLAHVR+KKGQIVDTVVQEQRPSVLLELGAYCGYSAVR+KKYDVDTLDMVFLDHWK+KYDVDTLDMVFLDHWK+KYDVDTLDMVFLDHWKDR+LLLPSAR+LLTIELNPDNAAIAQQVVDFAGLQDR+VTVVVGASQDIIPQLK+YDVDTLDMVFLDHWK+YLPDTLLLEECGLLR+YLPDTLLLEECGLLRK
F1RF50	1	Dimethylglycine mitochondrial	32	14	AWGSEMNCDTNPLEAGLEYFVK+EDSAALYDIIMNAGQEEGIDNFGTYAMNALR+EVGQMIGLEHPLIPVQHQYVVTSTIPEVK+ILAGLYNPGDGHIDPYSLTMALAAGAR+IQEMFPLLNMNK+KADIINIVNGPITYSPDILPMVGPHQGVR+LLDHLFANVIPQVGCTNISHMLTPK+NMTDVLGVLGVAGPHAR+NYPATVIQEPLVLTEPTR+SLAFAYVPVELSK+VANIPVTAIR+VGVIDLSPFGK+YLSDWILHGEPPFDLIELDPNR+YPAPVTSLKPR
P50578	1	Alcohol dehydrogenase [NADP(+)]	48.5	9	AWRDPNEPVLLEEPVVQALAEK+DAGHPLYPFNDPY+FIVPMLTVDGK+GLEVTAYSPLGSSDR+HIDCAAIYGNELEIGEALQETVGPGK+ILQNIQVFDFTFSPEEMK+MPLIGLGTWK+QIDDVLSVASVRPAVLQVECHPYLAQNELIAHCQAR+QLDALNK
P41367	1	Medium-chain specific acyl-CoA dehydrogenase, mitochondrial	22.5	7	AYAADIANQLATDAVQVFGGNGFNTEYPVEK+EEIIPVAAEYDR+ENVLTGEGAGFK+LLAEHQGISFLLADMAMK+MTEEPLMCAYCVTEPGAGSDVAGIK+TGEYPVPLLK+TRPPVAAGAVGLAQR
F1RKM1	1	Alpha-aminoadipic semialdehyde dehydrogenase-like	50	11	AYAQIR+FKNEDEVFAWNNEVK+GAPTTSLISVAVTK+GSDCGIVNVNIPTSGAEIGGAFGGEK+ILVEGVGEVQEYVDICDYAVGLSR+IQVLGSLVSLEMGK+QAVSMFLGAVEEAKK+QIGDALR+VGNPWDANVLYGPLHTK+VLEDNKLPGAICSLTCGGADIGTAMAKDEQVNLLSFTGSTQVGK+VMDRPGNYVEPTIVTGLDHSASIVHTETFAPILYVFK
I3LDJ8	1	Alcohol dehydrogenase 1c	58.8	19	AYGVSVIVGVPPNSQNISINPMLLLNGR+CSVCKHPEANICCK+FSLDSLITHVLPFEK+GAIFGGFK+GSLVTPLPMILGHEAAGIVESIGEGVTTVKPGDK+GSLVTPLPMILGHEAAGIVESIGEGVTTVKPGDKVIPLFVPQCGK+HPEANICCK+IDTMISALLCCQK+IIGVDINK+IIGVDINKDK+INEGFELLR+KFSLDSLITHVLPFEK+LVADFMAK+MVATGICR+NDLTNPR+SDDHVVR+SDDHVVRGSLVTPLPMILGHEAAGIVESIGEGVTTVKPGDK+VIPLFVPQCGK+VTQGSTCAVFGLGGVGLSVVMGCK
F1S814	1	Phosphoglucomutase-1	55.2	19	AYQDQKPGTSGLR+FFGNLMDASK+FKPFTVEIVDSVEAYATMLR+FNISNGGPAPEAITDKIFQISK+HGFFVNPSDSVAVIAANIFSIPYFQQTGVR+IALYETPTGWK+IDNFEYSDPVDGSISR+ILCEELGAPANSAVNCVPLEDFGGHHPDPNLTYAADLVETMK+IYQDPQVMLAPLISIALK+LSLCGEESFGTGSDHIR+NIFDFNALK+NIFDFNALKELLSGPNR+TGEHDFGAAFDGDGDRNMILGK+TIEEYAICPDLK+VFQSSANYAENFIQSIISTVEPAHR+VFQSSANYAENFIQSIISTVEPAHRQEATLVVGGDGR+VIFADGSR+VKVFQSSANYAENFIQSIISTVEPAHR+YDYEEVEAEGANK
P16549	1	Dimethylaniline monooxygenase [N-oxide-forming] 1	40.9	12	CCLEEGLEPTCFER+FTEHVEEGR+GQYFHSR+GVNKLPPSSVMIQEVNTR+IQLREPVLNDELPGR+MYANQFNLLK+NSLPTPIVNWLIAK+RVAIVGAGVSGLASIK+SVLVVGMGNSGTDIAVEASHLAK+VEDGQASLYK+VFDSGYPWDMVFMTR+YIFPAHLQKPTLAVIGLIKPLGSLLPTGDTQAR
I3LVE1	1	Isoform c of ketohexokinase	30.5	5	CGLQGFDGIV+GGNASNSCTVLSLLGAPCAFMGSLAPGHVADFLVADFGQR+KGATLVCAWAEEGADALGPDGR+TIVLYDTNLPDVSAK+TIVLYDTNLPDVSAKDFEK
P28491	1	Calreticulin	19.1	4	CKDDEFTHLYTLIVRPDNTYEVK+IDNSQVESGSLEDDWDFLPPKK+LFPDGLDQTDMHGDSEYNIMFGPDICGPGTK+SGTIFDNFLITNDEAYAEEFGNETWGVTK
Q08426	1	Peroxisomal bifunctional enzyme-like	29.1	8	CLYSLINEAFR+ELSGVDLVIEAVFEEMNLKK+GGPMFYASTVGLPTVLEK+ILEDGIAATPEHIDVVYLHGYGWPR+QNPDIPQLEPCDYLK+VSDLAGLDIGWK+YCPVPDMLCELGR+YSSPTTIATVMNLSK
F1RI39	1	Alpha-actinin-4	15.2	9	CQLEINFNTLQTK+FAIQDISVEETSAK+GYEEWLLNEIR+KDDPVTNLNNAFEVAEK+LASDLLEWIR+MVSDINNGWQHLEQAEK+SIVDYKPNLDLLEQQHQLIQEALIFDNK+TINEVENQILTR+VGWEQLLTTIAR
F1RF16	1	Isoform 3 of liver carboxylesterase 1	84.9	21	DAGAPTYMYEFQYRPSFSSDK+DAGAPTYMYEFQYRPSFSSDKKPK+DFNTVPYIVGINK+DLFLDLMGDVVFGVPSVTVAR+ESHPFLTTVVDGVLLPK+FWANFAR+GDAPEEEVSLSK+GEEVAFWNDLLSK+LKGEEVAFWNDLLSK+MPEEILAEKDFNTVPYIVGINK+QEFGWLLPTMMGFPLSEGK+QEFGWLLPTMMGFPLSEGKLDQK+QKSEDELLDLTLK+SEDELLDLTLK+SGNPNGEGLPHWPMYDQEEGYLQIGVNTQAAK+SYPIANIPEELTPVATDK+SYPIANIPEELTPVATDKYLGGTDDPVK+TATSLLWK+TVIGDHGDEIFSVFGFPLLK+TVIGDHGDEIFSVFGFPLLKGDAPEEEVSLSK+YLGGTDDPVK
C5I4T6	1	Phosphoenolpyruvate carboxykinase 2	48.6	23	DEGWLAEHMLILGITNPAGK+DTVPLPAGGAR+EIVSFGSGYGGNSLLGK+ETPIGLVPK+EVLAELEALEGR+FCAPAR+FDSDGQLR+GLGAIDTTQLFSIPK+GLGAIDTTQLFSIPKDFWEQEVR+GQLGNWMSPAEFQQAVDER+GVPLVYEAFSWR+LCQPEGIHICDGTEAENTATLALLEQQGLIR+LGKPVLQALGDGDFVK+QCPIMDPAWEAPEGVPIDAIIFGGR+SYLTEQVNQDLPK+SYLTEQVNQDLPKEVLAELEALEGR+TLIGHVPDQR+TMYVLPFSMGPVGSPLSR+TNLAMMRPALPGWK+TVIVTPSQR+VECVGDDIAWMR+VLNGDLGQLPAGVR+YVAAAFPSACGK
I3LDH5	1	Aldehyde oxidase	25.2	17	DEPGSYVPWSVPI+DLEPLILTIEEAIQHK+ELAIAYGGVGPTTICAK+GFGFPQTGLITESCIMEVAAK+GTSTETIPNANISGGSVVADLNGLAVK+HLDSDLNPLLAVGNCTLNLQSK+HYPANACLIPICSLYGAAVTTVEGIGSTR+IPAICDVPAELHISFLPPSQNSNTLYSSK+LFSEEEFLPLDPTQELIFPPELVTMAEK+LLSTDEVFCVGQLVCAVIADSEVQAK+MTWISPVTLK+NHPEPTLSQLTEALGGNLCR+NVNPETMLLPYLR+QIPLNEQFLK+QLPQDPIGHPVMHLSGIK+VFFGEGDGVIR+VKYPQAPVVMGNTSVGPDVK
F1SC62	1	Cytochrome P450 2C49 precursor	28.8	10	DFIDCFLIK+EIDSVIER+FDYTDPNFLTLLEK+FSLMTLR+GRLPPGPTPLSILGNILQLDVK+GTTVLTSLTSVLRDDQEFPNPEVFDPGHFLDESGNFK+GTTVLTSLTSVLRDDQEFPNPEVFDPGHFLDESGNFKK+LPPGPTPLSILGNILQLDVK+TNASPCDPTFLLGCAPCNVICSIIFHNR+YIDLIPISVPHAVTR
Q8SQ68	1	Cytochrome P450 2A19	29.6	11	DFIDSFLIR+DLQGLEDFIAR+EALVDQAEEFSGRGEQATFDWLFK+FFSNPR+GAFIDPTYFLSR+GEQATFDWLFK+GFNPQHFLDENGQFK+GTEVFPMLGSVLRDPK+LPPGPTPLPFIGNYLQLNTEQMYNSLMK+MPYTEAVIHEIQR+YGPVFTVHLGPR
P00439	1	Phenylalanine-4-hydroxylase, partial	44.9	7	DFLGGLAFR+HASKPMYTPEPDICHELLGHVPLFSDR+ILADSINGEVGILCNALQK+LLTLELEK+SFAQFSQEIGLASLGAPDEYIEK+TAVQEYTVTEFQPVYYVAESFSDAK+YCGFCEDNIPQLEEVSQFLQSCTGFR
F1SFF8	1	Glycogen phosphorylase, liver form	27.4	16	DFNVGDYIQAVLDR+DIWNMEPSDLK+EYYEALPELK+FGSSDSAGTAFDAFPDQVAIQLNDTHPALAIPELMR+GIVGVENVAELK+IFVDIEKLPWSK+LAIDQIDKGFFSPK+LITSVAEVVNNDPVVGSK+LKQEYFVVAATLQDVIR+RWLLLCNPGLAELIAEK+TFAYTNHTVLPEALER+VLYPNDNFFEGK+VSQLYMNPK+WLLLCNPGLAELIAEK+WPVELVEK+WVDTQVVLALPYDTPVPGYLNNTVNTMR
P79383	1	Cytochrome P450 2E1	26.7	9	DFTDTLLMEMEKEK+DIDLSPIAIGFAK+DSLEPSCPR+FIDLIPSNLPHEATR+GTVVIPTLDSVLYDSQEFPEPEK+KTHGQPFDPTFLIGCAPCNVISDILFR+LVMPYLDAVVHEIQR+THGQPFDPTFLIGCAPCNVISDILFR+YSAEPIYTLDNIAVTVADMFFAGTETTSTTLR
F1SCT4	1	Cytochrome P450 2E1	36.5	9	DFTDTLLMEMEKEK+DIDLSPITIGFAK+DSLEPSCPR+FIDLIPSNLPHEATR+GTVVIPTLDSVLYDSQEFPEPEK+KTHGQPFDPTFLIGCAPCNVISDILFR+LDMPYLDAVVHEIQR+THGQPFDPTFLIGCAPCNVISDILFR+YSAEPIYTLDNIAVTVADMFFAGTETTSTTLR
Q9TSX9	1	Peroxiredoxin-6	62.8	17	DFTPVCTTELGR+DINAYNGEEPK+DINAYNGEEPKETLPFPIIDDK+DLAIQLGMLDPAEKDEQGMPVTAR+ETLPFPIIDDK+FHDFLGDSWGILFSHPR+KLFPK+LAPEFAK+LSILYPATTGR+MIALSIDSVEDHLAWSK+NFDEILR+NGDSVMVLPNIPEEEAK+VATPVDWK+VATPVDWKNGDSVMVLPNIPEEEAK+VATPVDWKNGDSVMVLPNIPEEEAKK+VVFIFGPDK+VVFIFGPDKK
F1ST01	1	Selenium-binding protein 1	58.3	21	DGFNPADVQAGLYGSCLHVWDWQR+EEIVYLPCIYR+FLHNPAASQGFVGCALGSNIQR+GGFVLLDGETFEVK+GGPVQVLEDQELK+GTWERPGGAAPLGYDFWYQPR+HEMVQTLHLQDGLIPLEIR+HNVMISTEWAAPNVLR+IYVVDVGTEPR+LMLPCLISSR+LNPNFLVDFGK+LNPNFLVDFGKEPLGPALAHELR+NTSTEAPDYLATVDVDPK+QFYPDLIR+QYDISDPK+SPQYCQVIHR+SQPEPLVVK+VAGGPQMIQLSLDGK+VAGGPQMIQLSLDGKR+VIEPQDIHAK+YPGGDCSSDIWL
F1RWY0	1	Regucalcin	79.9	22	DGLDPQGLLQQPEAGGIFK+DYSEMYVTCAR+ENCHCGESPVWEEASNSLLFVDIPAK+ENCHCGESPVWEEASNSLLFVDIPAKK+FCALNWEDESAVVLAAVDK+FCALNWEDESAVVLAAVDKDK+FCALNWEDESAVVLAAVDKDKK+FNDGKVDPAGR+GLPPYPYAG+HQGSLYALFADHHVEK+IECVLR+ITGLGVK+LDPETGKR+LWVACYNGGR+MEKEEHIPDGMCIDTEGK+QAGGYVATVGTK+TTSCCFGGK+TTSCCFGGKDYSEMYVTCAR+VTLDAPVSSVALR+WNALSK+YFAGTMAEETAPAVLER+YFDQVDISNGLDWSLDHK
Q0PY11	1	Elongation factor 1-alpha	50.6	18	DGNASGTTLLEALDCILPPTRPTDKPLR+DGNASGTTLLEALDCILPPTRPTDKPLRLPLQDVYK+EHALLAYTLGVK+EVSTYIK+IGGIGTVPVGR+IGYNPDTVAFVPISGWNGDNMLEPSANMPWFK+KDGNASGTTLLEALDCILPPTRPTDKPLR+KDGNASGTTLLEALDCILPPTRPTDKPLRLPLQDVYK+KIGYNPDTVAFVPISGWNGDNMLEPSANMPWFK+KLEDGPK+NMITGTSQADCAVLIVAAGVGEFEAGISK+QLIVGVNK+QTVAVGVIK+SGDAAIVDMVPGKPMCVESFSDYPPLGR+STTTGHLIYK+TIEKFEK+VETGVLKPGMVVTFAPVNVTTEVK+YYVTIIDAPGHR
P01025	1	Complement C3	8.6	9	DICEPQVNSLLR+ELSDDFDDYIMVIEQIIK+ILLQGTPVAQMVEDAIDGDR+ILLQGTPVAQMVEDAIDGDRLK+LIAEGK+QCQDLANFSENMVVFGCPN+SDLDEEIIPEEDIISR+SSVPVPYIIVPLK+TGIPIVTSPYQIHFTK
Q5S1S4	1	Carbonic anhydrase 3	38.2	12	DIKHDPSLLPWTASYDPGSAK+EAPFTNFNPSCLFPACR+EKGEFQLVLDALDK+EKGEFQLVLDALDKIK+GDNQSPIELHTK+GEFQLVLDALDK+GEFQLVLDALDKIK+GGPLTAAYR+GKEAPFTNFNPSCLFPACR+HDPSLLPWTASYDPGSAK+SLYSSAENEPPVPLVR+VVFDDTYDR
Q29092	1	Endoplasmin	26.9	16	DISTNYYASQK+EAVEKEFEPLLNWMK+EEASDYLELDTIK+EFEPLLNWMK+ELISNASDALDKIR+GVVDSDDLPLNVSR+GYEVIYLTEPVDEYCIQALPEFDGKR+IYFMAGSSR+LTESPCALVASQYGWSGNMER+SGTSEFLNK+SGYLLPDTK+SILFVPTSAPR+TFEINPR+TVWDWELMNDIKPIWQRPSK+VFITDDFHDMMPK+VKEDEDDKTVSDLAVVLFETATLR
K7GP28	1	3-hydroxyacyl- dehydrogenase type-2	74.3	12	DLAPMGIR+GGIVSMTLPIAR+GLVAIITGGASGLGLATAER+GVIINTASIAAFEGQVGQAAYSASK+LDGAIR+LGDPAEYAHLAQVIIENPFLNGEVIR+LVAGEMGQNEPDQGGQR+LVGQGASAVLLDLPHSDGEAQAK+NFLANQVPFPSR+SCAFAPADVTSEKDVQAALTLAK+VMTIAPGLFGTPLLNTLPDK+VMTIAPGLFGTPLLNTLPDKVR
P79381	1	Epoxide hydrolase 1	39.2	13	DLELLYPFKK+ESGYMHIQSTKPDTVGCALNDSPVGLAAYILEK+FSTWTNEEFRDLEDGGLER+GGHFAAFEEPELLAQDIR+GGHFAAFEEPELLAQDIRK+IEGLDIHFIHVKPPQLPSGR+IIPLLTDPK+LISYSYMAR+LTPPLEDSR+NHGLSDEHVFEVICPSIPGYGFSEASSK+TAKPLLMVHGWPGCFYEFYK+TKIEGLDIHFIHVKPPQLPSGR+VHVPTGFAAFPSEVLHCPEK
P19224	1	UDP-glucuronosyltransferase precursor	11.6	6	DLENALNTVIK+DLENALNTVIKDK+GAGVTLNVLEMTSK+GAGVTLNVLEMTSKDLENALNTVIKDK+LLVIPVEGSHWLSMVGVIQQLQQK+YTGPAPPNLAK
E1CAJ5	1	Glucose regulated protein 58	40.8	14	DLFSEAHSEFLK+EATNPPIIQEEKPK+ELSDFISYLQR+FAHTNVESLVDKYDDDGEGITLFRPLHLMNK+FIQENIFGICPHMTEDNKDLIQGK+FISDKDASVVGFFK+FLQDYFDGNLKR+KLNFAVASRK+KTFSHELSDFGLESTAGEIPVVAIR+LAPEYEAAATR+QAGPASVPLRTEEEFEK+TFSHELSDFGLESTAGEIPVVAIR+VVVAENFDEIVNDENK+YGVSGYPTLK
D0G7F6	1	Triosephosphate isomerase	65.3	11	DLGATWVVLGHSER+ELASQPDVDGFLVGGASLKPEFVDIINAK+IAVAAQNCYK+IIYGGSVTGATCK+KNNLGELINTLNAAK+LPADTEVVCAPPTAYIDFAR+NNLGELINTLNAAK+THVSEAVAQSTR+VAHALAEGLGVIACIGEK+VANGAFTGEISPGMIK+VVLAYEPVWAIGTGK
F1SKJ1	1	Myosin-9	5.2	5	DLGEELEALKTELEDTLDSTAAQQELR+IIGLDQVAGMSETALPGAFK+LQQELDDLLVDLDHQR+QLLQANPILEAFGNAK+SMEAEMIQLQEELAAAER
Q6Q7J2	1	Rab GDP dissociation inhibitor beta	21.8	7	DLGTDSQIFISR+FNIPGAPPASMGR+FVSISDLLVPK+IYKVPSTEAEALASSLMGLFEK+NPYYGGESASITPLEDLYKR+SPYLYPLYGLGELPQGFAR+VPSTEAEALASSLMGLFEK
F1SLF0	1	Sepiapterin reductase	33.1	5	DMIYQVLAAEDPSLR+TLAQLLAPLLSPGSVLVLTAR+VLLFNNAASLGDVSK+VLSYAPGPLDTDMQQIAR+VPADLGAEAGLQQLLGALR
F1SND2	1	Alanine--glyoxylate aminotransferase mitochondrial	40.6	14	DQYIEQFKDTLSTSVAK+EVGTYLLLK+GGVCIADEVQTGFGR+GIGNGFPMAAVVTSPEIAESLAK+IAPSMCITKPEVDFAVEVFR+ISFSR+LGSHFWGFQTHDVLPDIVTMAK+LNAAAQTQLGR+LRDEFDIVGDVR+LSALLPEPLK+QPLPGEEVNQILMDCK+SIAGFFAEPIQGVSGVVQYPK+VIFLVNSGSEANDLAMLMAR+YQSIAYSR
F1RFY1	1	Profilin	32.9	4	DSLLQDGEFTMDLR+SSFFVNGLTLGGQK+TFVNITPAEVGVLVGK+TFVNITPAEVGVLVGKDR
P79384	1	Propionyl-CoA carboxylase beta chain, mitochondrial	9.4	4	DTSYLFITGPDVVK+GFVDDIIQPSSTR+ISLLLDPGSFIESDMFVEHR+LVPELDTVVPLESTR
I3LIM2	1	UDP-glucose 6-dehydrogenase	33.4	10	DVLNLVYLCEALNLPEVAR+EQIVVDLSHPGVSEDDQVAR+IFDANTKPNLNLQVLSNPEFLAEGTAIQDLK+IIDSLFNTVTDK+IIDSLFNTVTDKK+INAWNSPTLPIYEPGLK+ISSINSISALCEATGADVEEVATAIGMDQR+VLDGLHNELQTIGFQIETIGK+VLDGLHNELQTIGFQIETIGKK+VLIGGDETPEGQR
F1S3H7	1	Prostaglandin reductase 2	27	4	DVPYPPPLPPAIEAIQK+MNEDTGSDYITPWQLSQVVDGGGVGIIEESR+TLYLSVDPYMR+VDPQLVDGHLSYFLGAIGMPGLTSLIGIQEK
F1S418	1	Thioredoxin-dependent peroxide mitochondrial	10.7	2	DYGVLLEGPGLALR+GLFIIDPNGVIK
P18648	1	Apolipoprotein A-I	14.4	3	DYVAQFEASALGK+LLDNWDSLGSTFTK+QGLLPVLENLK
F1SRX1	1	Sterol 26- mitochondrial	22.2	3	EAEGSLPELLMAGVDTTSNTLTWALYHLSK+MLKPADAALYTNALNEVVDDFMVR+VITDKEIEVGGFLFPK
F1RII7	1	Hemoglobin subunit beta	91.8	15	EAVLGLWGK+FFESFGDLSNADAVMGNPK+HLDNLK+KVLQSFSDGLK+LGHDFNPDVQAAFQK+LLGNVIVVVLAR+LLVVYPWTQR+LSELHCDQLHVDPENFR+RLGHDFNPDVQAAFQK+VHLSAEEK+VHLSAEEKEAVLGLWGK+VLQSFSDGLK+VNVDEVGGEALGR+VVAGVANALAHK+VVAGVANALAHKYH
P02067	1	Hemoglobin subunit beta	94.2	14	EAVLGLWGK+FFESFGDLSNADAVMGNPK+HLDNLK+KVLQSFSDGLK+LLGNVIVVVLAR+LLVVYPWTQR+LSELHCDQLHVDPENFR+RLGHDFNPNVQAAFQK+VHLSAEEK+VHLSAEEKEAVLGLWGK+VLQSFSDGLK+VNVDEVGGEALGR+VVAGVANALAHK+VVAGVANALAHKYH
I3LK75	1	Nicotinate-nucleotide pyrophosphorylase [carboxylating]	26.1	3	EDCPGLNPVALVTGAAPSQAVLWAK+LFAEGTTPVPYAR+VEVECSSLQEALEAAEAGADLVLLDNFRPEELHPTAAALK
A0A2I0TVD4	1	Fatty aldehyde dehydrogenase isoform X1	15.9	5	EEDLLAAIAADLSK+VMREEIFGPILPIVPVK+VSKGRLGLLFLALLGVVLAVLLK+VTLELGGK+YIAPTILTDVDPEAK
F1RKC9	1	Serine dehydratase-like	26.7	4	EFEIFSEVVEDVEAVSAVQR+GKPFHIVTPLLESWPLSQMAGTPVLLK+MLVEPACGAALAAIYSGLLGR+NLGIPATIVLPESTSLQVVR
I3L9Y6	1	Hydroxypyruvate isomerase	22	3	EFLPIVGHVQVAQVPGR+GEMETVFLENLR+HAAGVLAQENLVGLLEPINTR
P79303	1	UTP--glucose-1-phosphate uridylyltransferase	39.1	17	EFPTVPLVK+FLPVK+FVQDLSK+GGTLTQYEGK+GLPDNISSVLNK+IDIPPGAVLENK+IQRPPEDSIQPYEK+IVSGNLR+IYTFNQSR+LVEIAQVPKPHVDEFK+NENTFLDLTVQQIEHLNK+SFENSLGINVPR+SLIGVR+TLDGGLNVIQLETAVGAAIK+TTSDLLLVMSNLYSLNAGSLTMSEK+TTSDLLLVMSNLYSLNAGSLTMSEKR+TYNTDVPLVLMNSFNTDEDTKK
Q9GJX5	1	Taurochenodeoxycholic 6 alpha-hydroxylase	27.9	6	EFQEESELQPLLK+FELAPDPSRIPVPIQGIVLK+LEIVGPVSLMTLDTIMK+MLTPAFHYDILKPYVGLMAK+SAFLQNDIIYR+TVPALASVSGLLQVASLLGLLLLLLK
P62936	1	Peptidyl-prolyl cis-trans isomerase A	72.8	8	EGMNIVEAMER+FDDENFILK+HTGPGILSMANAGPNTNGSQFFICTAK+HVVFGK+IIPGFMCQGGDFTR+TAENFR+VNPTVFFDIAVDGEPLGR+VSFELFADKVPK
P00506	1	Aspartate aminotransferase, mitochondrial	23.4	9	EGSSHNWQHIVDQIGMFCFTGIKPEQVER+IASTILTSPDLR+IGANFLQR+IGANFLQRFFKFSR+ISVAGVTSGNVGYLAHAIHQVTK+NLDKEYLPIGGLAEFCK+TCGFDFTGALEDISK+VGAFTVVCK+YVTVQTISGTGALR
F1RL41	1	Beta-ureidopropionase	24.2	5	EKLPWTEFAESAEDGPTTR+GDFELLGCAFEAVEEQQR+VGDFNESTYYMEGNLGHPVFQTPFGR+VGLVQNR+YEMYAQELAEAVKPSYSPNIVKE
F1RL38	1	D-dopachrome decarboxylase	65.3	6	ELDLAQDR+FFEFLTK+FLPLEPWQIGK+KGTIMTFL+VNVTVRPGLVMALNGSAEPAAQLLVSSIGVVGTAEENR+VNVTVRPGLVMALNGSAEPAAQLLVSSIGVVGTAEENRVHSAR
F1SK00	1	Isocitrate dehydrogenase	10.2	5	ELFEK+LIDDMVAQVLK+LNEHFLNTSDFLDTIK+NILGGTVFR+NILGGTVFREPIICK
Q92503	1	SEC14-like protein 3 isoformX1	23	6	ENVQDVLPALPNPDDYFLLR+FRENVQDVLPALPNPDDYFLLR+GSSHQVEYEILFPGCVLR+LISPEELPAQFGGTLTDPDGNPK+TMDIDHILDWQPPEVIQK+TQYEHSVQISR
P00172	1	Cytochrome b5	56.1	4	EQAGGDATENFEDVGHSTDAR+FLEEHPGGEEVLR+TFIIGELHPDDR+YYTLEEIQK
Q9TV69	1	Trans-1,2-dihydrobenzene-1,2-diol dehydrogenase	17.3	6	ESPMITLAESELLADILEEVR+ESPMITLAESELLADILEEVRK+FFPAVEALR+GLKESPMITLAESELLADILEEVRK+GMAQILDPCWCPTELVVK+SVLAQETLGDLR
F1SKL2	1	Sulfurtransferase	43.1	9	ESPYEMMLPTEAGFADYVGR+FQLVDSR+HVPGASFFDIEECR+KVDLTKPLIATCR+LGPSLR+TYEQVLENLESK+TYEQVLENLESKR+VLDASWYSPGTR+YLGTEPEPDAVGLDSGHIQGSVNMPFMNFLTEDGFEKGPEELR
F1RQP0	1	Peroxiredoxin- mitochondrial	73.5	12	ETDLLLDDSLVSLFGNR+ETDLLLDDSLVSLFGNRR+FSMVIEDGIVK+GVLFGVPGAFTPGCSK+LLADPTGAFGK+LLADPTGAFGKETDLLLDDSLVSLFGNR+LLADPTGAFGKETDLLLDDSLVSLFGNRR+SLNVEPDGTGLTCSLAPNIISQL+THLPGFVEQAEALK+VGDAIPSVVVFEGEPEK+VGDAIPSVVVFEGEPEKK+VNLAELFK
F1SB62	1	Acetyl-CoA acetyltransferase, cytosolic	42.3	8	EVSEVIFGHVLTAGCGQNPVR+GLTPLAHIVSWSQAGVEPSIMGTGPIPAIK+IVVAGGMENMSK+LGEAALTDSILCDGLTDAFHNYHMGITAENVAK+LKPYFLTDGTGTVTPANASGINDGAAAVVLMK+LVSAAR+TDEFPRPGSTLEAMSK+TVIGSFNGALSTVPVHDLGSTVIR
I3LM03	1	Carbonyl reductase	25.6	6	EYGGLNVLVNNAGIAFK+FKSETITEEELVGLMNK+ILLNACCPGWVR+NVCTELLPLIKPQGR+SETITEEELVGLMNK+VVNVSSTESVR
P00348	1	Hydroxyacyl-coenzyme A dehydrogenase, mitochondrial	48.9	7	FAGLHFFNPVPLMK+FIIDGWHEMDSQNPLFQPSPAMNK+HVTVIGGGLMGAGIAQVAAATGHTVVLVDQTEDILAK+LGAGYPMGPFELLDYVGLDTTK+LLVPYLIEAVR+TLESLVDFSK+TLSSISTSTDAASVVHSTDLVVEAIVENLK
P51659	1	Peroxisomal multifunctional enzyme type 2	34.6	16	FAKPVYPGQTLQTEMWK+FIYEGNSDFSCLPTFGVILAQK+GASVVVNDLGGDMK+HVLQQYADRDVLR+ICDFDNATKPQR+IDVVVNNAGILR+IPSEGGDLQSNLVFEEIGR+IPSEGGDLQSNLVFEEIGRR+IQDSVSTVIEALSK+LGLLGLSNSLAVEGK+NNIHCNTVAPVAGSR+SLGGGGLAEIPGLSVNFTK+TYALAFAER+VAVAIPNRPPDAILTDTTSLNQAALYR+VLHGEHYLELYKPLPNAGDLK+VQETGDTVISNAYVDLVPTSDTLAK
I3LIJ3	1	Isoform 2 of 3-oxo-5-beta-steroid 4-dehydrogenase	72.3	6	FCQQHDIVIIAYSPLGTSR+FSIQR+GVVVIPK+NPSWVNVSSPPLLKDELLNSLGK+SFTPER+TAAQVVLR
Q45FY6	1	Hypoxanthine-guanine phosphoribosyltransferase	60.9	9	FFADLLDYIK+ILVKR+NVLIVEDIIDTGK+SIPMTVDFIR+SPSVVISDDEPGYDLDLFCIPNHYAEDLEK+SVGYRPDFVGFEIPDK+TMQTLLSLVK+VFIPHGLIMDR+VIGGDDLSTLTGK
I3LHQ6	1	17-beta-hydroxysteroid dehydrogenase type 6	32.5	9	FFDAYHDVMK+IVNVSSILGR+KQTSDRLETVLLDVTK+LETVLLDVTK+QGLSSCSTNLNLVTDCMEHALTSVHPR+QTSDRLETVLLDVTK+TESIAAATQWVK+VNLIGVTEVTLSMLPLVK+VSIVEPGYFR
F1SSR4	1	Isovaleryl- mitochondrial	18.8	3	FLQEHLAPQAQEIDQSNEFK+GSNTCELIFEDCKVPAVNILGQLSK+QLGNLGVLGITAPVQYGGTGLGYLEHVVVMEEISR
F1RIS8	1	Mevalonate kinase	15	4	FPEIIAPLLASMDAISLECER+LQLLDTSFLEQGDLTEQVEK+MLKFPEIIAPLLASMDAISLECER+WTEENLELINK
I3LRS5	1	Retinal dehydrogenase 1	62.2	13	FPVFNPATEEK+GQLLNK+IGPALSCGNTVVVKPAEQTPLTALHVASLIK+KFPVFNPATEEK+LADLIER+LCEVEEGDKEDVDK+LCEVEEGDKEDVDKAVK+LFSNAYLMDLGGCIR+LLLATMESMNGGK+QAFQIGSPWR+TIPMDGNFFTYTR+YCAGWADK+YCAGWADKIHGR
F1SU52	1	Fumarylacetoacetate hydrolase domain-containing protein 2a	32.3	5	FVTVYPGDIILTGTPAGVGVFR+KGDEVQCEIEELGVIVNK+LVQFQAPHLTGPHLGLESGNGGGVINLSAFDPTLPK+TEELIAWVSR+TFDTFCPLGPALVTK
F1SUP1	1	Isoform of voltage-gated potassium channel subunit beta-1	12.5	3	FYAYNPLAGGLLTGK+QVETELFPCLK+VDLFYLHAPDHGTPVEETLR
F1ST73	1	Glyoxylate reductase hydroxypyruvate reductase	22.8	3	GEVVNQDDLYQALTSGQIAAAGLDVTTPEPLPTNHPLLTLK+NTMSVLAANNLLAGLR+VISTMSVGVDHLALDEIK
F1RXQ9	1	Ornithine carbamoyltransferase, mitochondrial	56.2	15	GEYLPLLQGK+GGNVLITDTWISMGQEEEK+GGNVLITDTWISMGQEEEKK+GLTLSWIGDGNNILHSIMMSAAK+GYEPDPSITK+KPEEVDDEVFYSPQSLVFPEAENR+KPEEVDDEVFYSPQSLVFPEAENRK+LAEQYAK+LQAFQGYQVTMK+LSLTNDPLEAAR+LSTETGFALLGGHPCFLTTQDIHLGVNESLKDTAR+NFTGEEIK+SLGMIFEK+TAEVAASDWTFLHCLPR+VLSSMTDAVLAR
F1SNJ5	1	3-oxo-5-beta-steroid 4-dehydrogenase	53.7	10	GICGTSVK+HIDGAFIYQNEHEVGEAIR+HIDGAFIYQNEHEVGEAIREK+IAIDTGYR+ILNKPGLK+IPLNDGNSIPIIGLGTFSEPK+LWATNLDPEMVRPALER+QLELILNKPGLK+SLGVSNFNR+SNLCGTWEALEACKDDGLVK
F1SQ01	1	Peroxiredoxin-4	9.7	4	GLFIIDDK+GLFIIDDKGILR+IPLLSDLNHQISK+QITINDLPVGR
P34896	1	Serine hydroxymethyltransferase, cytosolic	10.3	6	GLLEEDFQEVAR+LFHPK+LGTPALTSR+QAMTPEFR+SALRPSGLR+VYQCQVVANCR
F1RKG8	1	Phosphatidylethanolamine-binding protein 1	79.1	12	GNDISSGTVLSDYVGSGPPK+GTGLHR+LYEQLSGK+LYTLVLTDPDAPSR+SRPTSITWDGLNPDKLYTLVLTDPDAPSR+SRPTSITWDGLNPDKLYTLVLTDPDAPSRK+VLTPTQVK+WSGPLSLQEVDERPQHPLQVK+YGGAEVDELGK+YQLGAPVAGTCYQAEWDDYVPK+YVWLVYEQDGPLK+YVWLVYEQDGPLKCDEPILSNR
O02734	1	Hydroxymethylglutaryl-CoA synthase, mitochondrial	15	5	GNSRPTGGAGAVAMLVGPEAPLALER+LVSSVSDLPER+TQLPWDSVGWLEVGTETIIDK+VNFTPPGDPNSLFPGTWYLER+VSPEEFTEIMNQR
Q6PLK3	1	Amine oxidase [flavin-containing] B	18.1	6	GPLPPVRNPITFLDLNNLWR+IPEDEIWQSEPESVDVPAKPITTTFLER+LERPVVHIDQTGENVLVETLNHEVYEAK+NPITFLDLNNLWR+VKLERPVVHIDQTGENVLVETLNHEVYEAK+YVISAIPPVLGMK
Q2TJA5	1	Aldo-keto reductase	46.6	11	GVVVLAK+IADGTVKR+ILNKPGLK+LDYVDLFIIHVPITMKPGEELLPK+LLFAVDHPYYPYSEEY+LNDGHLMPVLGLGTLVSEGVPK+SPAQVALR+TIDGLNQNLR+VIFDTVDLR+WVEESNPYLLEDPVLNAIAK+YKPVCNQVECHPYLNQSK
A6NGG8	1	Uncharacterized protein	22.3	8	HISANEAR+IAHAEAQVGFPEVTLGILPGAR+KLGILDEVVNSDPVEEAIR+LGILDEVVNSDPVEEAIR+LIGVPAALDLITSGR+LQNALALLR+LRNPPVNALSVSVLHGIK+TSDLTLGDIVDK
I3LP02	1	Acetyl-CoA acetyltransferase, mitochondrial isoform X1	13.8	3	IAAFADAAVDPIDFPIAPAYAVPK+SEVIPVTISVK+TPIGSFLGSLSSLPATK
F1S2N0	1	Maleylacetoacetate isomerase	58.8	7	IDGITLSQSLAIIEYLEETRPTPR+MISDLLASGIQPLQNLSVLNQVGK+MISDLLASGIQPLQNLSVLNQVGKENQLTWAQR+NIDYEIVAINLIK+SLLALEAFQVSHPSR+VIAPGFNALEQILQSTAGK+YCMGDEVSMADLCLVPQVANAER
A0A287AXR4	1	Arylacetamide deacetylase	12.4	2	IGILGDSAGGNLAAAVTQQLIDDPDVK+TQSLIYPALQILDVDLPSYR
I3LQS0	1	Heterogeneous nuclear ribonucleoprotein k	7.9	2	IILDLISESPIK+IITITGTQDQIQNAQYLLQNSVK
P00761	1	Trypsin	25.1	4	IITHPNFNGNTLDNDIMLIK+LGEHNIDVLEGNEQFINAAK+LSSPATLNSR+VATVSLPR
P08059	1	Glucose-6-phosphate isomerase	17.7	5	ILLANFLAQTEALMK+NLVTEAVMQMLVDLAK+SITDVINIGIGGSDLGPLMVTEALKPYSAEGPR+SNTPILVDGKDVMPEVNR+TLATLNPESSLFIIASK
F1SUU6	1	Mitochondrial	30.7	4	IVAAGCIPLTLGGDHTITYPILQAMSEK+LPVQASPEGLDAAFIGVPLDIGTSNRPGAR+QQMGGKPIYISFDIDSLDPAYAPGTGTPEIAGLTPSQALEIIR+SLVPLMGEVR
F1RXC2	1	Carbonic anhydrase 2	23.8	3	IVDVLDSIK+QSPVDINTSTAVHDPALKPLSLCYEQATSQR+YKDFGEAAQQPDGLAVLGVFLK
Q3S3F7	1	Hydroxysteroid sulfotransferase	31.2	7	KLEPEELSSVVENSSFQVMK+LISSHLPIQLFPK+MADLPQELFPWQ+NYFTVAQAEAFDK+NYFTVAQAEAFDKLFQEK+QILSPEMLQEVR+SPWLESISGYENLK
I3L7P7	1	Copper transport protein ATOX1	47.1	2	LGGVQFDIDLPNKK+VCIDSEHSVDTLLETLGK
F1SR05	1	L-lactate dehydrogenase	21.1	5	LIAPVAEEETTIPNNK+MVVESAYEVIK+SLTDELALVDVLEDK+SLTDELALVDVLEDKLK+VIGSGCNLDSAR
F1SRC5	1	Aconitate hydratase, mitochondrial	9.4	3	LQLLEPFDKWDGKDLEDLQILIK+NDANPETHAFVTSPEIVTALAIAGTLK+VAMQDATAQMAMLQFISSGLPK
I3LLX8	1	Sulfotransferase	40.3	7	SGTTWVSEILDLIYQGGDLQK+SLPEETVEDIVQHTSFQEMK+STFTVAQNER+THLPLTLLPQTLLDQK+TLPSDLLDHSISAFMR+VPFLEFK+YFAEALGPLESFQAWPDDVLISTYPK
F2Z580	0.9999	Histone H2B	46	6	AMGIMNSFVNDIFER+EIQTAVR+ESYSVYVYK+LAHYNKR+LLLPGELAK+QVHPDTGISSK
I3LTZ3	0.9999	Homogentisate -dioxygenase	23.1	5	CFYNSDGDFLIVPQK+DFLIPVAWYEDLQVPGGFTVINK+KVDFVSGLHTLCGAGDIR+QDVSPFNVVAWHGNYTPYK+YNLENFMVINSVAFDHADPSIFTVLTAK
I3L8S3	0.9999	Carboxymethylenebutenolidase homolog	24.6	2	DAEDVYDLKNPTLFIFAENDAVIPLEQVSLLTQK+NPTLFIFAENDAVIPLEQVSLLTQK
F1S4Y7	0.9999	Adenosylhomocysteinase	7.1	2	DGPLNMILDDGGDLTNLVHTK+DGPLNMILDDGGDLTNLVHTKYPELLSGIR
K7GKE7	0.9999	Haptoglobin	11.6	2	SPVGVQPILNEHTFCAGLSK+VTSILDWIQTTIADN
I3LR32	0.9998	chaperonin containing TCP1, subunit 5 (epsilon)	10.9	2	AFADALEVIPMALAENSGMNPIQTMTEVR+SQDDEIGDGTTGVVVLAGALLEEAEQLLDR
F1S6M7	0.9998	Tubulin beta-3 chain	21.6	8	AILVDLEPGTMDSVR+ALTVPELTQQMFDAK+GHYTEGAELVDSVLDVVR+GHYTEGAELVDSVLDVVRK+IMNTFSVVPSPK+ISVYYNEASSHK+LAVNMVPFPR+NSSYFVEWIPNNVK
F1SNL7	0.9998	Cytosolic non-specific dipeptidase	15.2	4	ALQTVFGVEPDLTR+EGGSIPVTLTFQEATGK+GATDDKGPVAGWVNALEAFQK+LVPDMTPEVVSEQVISYLTK
F1SAF0	0.9998	Dihydrolipoyl dehydrogenase	13.9	3	IPNIYAIGDVVAGPMLAHK+RPFTQNLGLEELGIELDPR+VLGAHIIGPGAGEMINEAALALEYGASCEDIAR
I3LN42	0.9998	vitamin d-binding protein	7.8	3	LAQKVPTANLEDVLPLAEDVATILSK+VLDQYIFELSR+VPTANLEDVLPLAEDVATILSK
P12026	0.9998	Acyl-CoA-binding protein	31.2	2	QATVGDINTERPGILDLK+TKPADDEMLFIYSHYK
I3LQA1	0.9997	Aldehyde dehydrogenase 8 family, member A1	10.8	3	APWMLENFIDGK+LADLLEESLEELAQAESK+LADLLEESLEELAQAESKDQGK
F1ST54	0.9997	Aldehyde dehydrogenase mitochondrial	17.6	5	EEIFGPVQPLFK+EVGFPPGVVNILTGYGPTAGTAIAHHMDVNK+HEPVGVCGQIIPWNFPLVMQAWK+VAEQTPLSALYLASLIK+VTLELGGK
P52552	0.9997	Peroxiredoxin-2	43.3	5	EGGLGPLKIPLLADVTR+GLFIIDGK+KEGGLGPLKIPLLADVTR+NLSLDYGVLKEDEGIAYR+QITVNDLPVGR
P22234	0.9997	Multifunctional protein ADE2 isoform X1	11.3	2	EIVLADVIDNDSWR+LPSGLGCSTILSPEGSAQFAAQIFGLNNHLVWAK
F1SUE3	0.9997	Inorganic pyrophosphatase	13.1	2	VIAINVDDPDAANYNDINDVKR+VLGILAMIDEGETDWK
F1RVA0	0.9996	Histone H3	40.4	4	EIAQDFK+FQSAAIGALQEASEAYLVGLFEDTNLCAIHAK+STELLIR+YRPGTVALR
F1SU97	0.9995	Saposin-B-Val	8.4	3	EIVDSYFPVILDMIK+GDVCQDCIQMVTDLQNAVR+LGPGMADMCK
Q5S1U1	0.9995	Heat shock protein beta-1	30.7	3	LFDQAFGLPR+LPEEWSQWLSHSGWPGYVRPLPPPAIEGPAAVAAPAYSR+VSLDVNHFAPEELTVK
F1RPB0	0.9994	Acyl-coenzyme a synthetase mitochondrial	7.3	2	AFVVLDPQFLSHDLDQLTK+AIVAGDEVAQAVDTVAPDCPSLK
F1RUR0	0.9994	UDP-glucuronosyltransferase 2B18-like	15.8	4	ANTIASAFAQIPQK+LDLDTVSTTDLVNALK+QVINNPFYK+TDLVNALK
I3LLY3	0.9994	Alpha-actinin-1	13.6	9	CQLEINFNTLQTK+DQALTEEHAR+FAIQDISVEETSAK+GISQEQMNEFRASFNHFDR+GYEEWLLNEIR+IDQLEGDHQLIQEALIFDNK+LASDLLEWIR+TINEVENQILTR+VGWEQLLTTIAR
F1S8P1	0.9992	saccharopine dehydrogenase-like oxidoreductase	13.3	2	GPEAGYVATPIAMVQAALTLLNDASDLPK+LGRPTLPSEVGIIICDITNPASLDEMAK
I3LUZ8	0.9992	3-hydroxyisobutyrate dehydrogenase, mitochondrial	33.7	4	GSLLIDSSTIDPMISK+HGYPLIIYDVFPDACKEFLDAGEQVVSSPADVAEK+HGYPLIIYDVFPDACKEFLDAGEQVVSSPADVAEKADR+KGSLLIDSSTIDPMISK
F1SQR6	0.9991	Imidazolonepropionase	11.9	2	AAELGAELGAQAVSHLEEVSDEGIAAMATAR+MSMPEALAAATINAAYALGR
F1RUQ8	0.9991	UDP-glucuronosyltransferase	12.8	5	ANTIASAFAQIPQK+IILEELVTR+ITTAQNIFSELSDVSLK+QVINNPFYK+TDLVNALK
A0A287ALR5	0.999	Bile acyl-CoA synthetase-like, partial	18.1	3	AELGDALGPHEREPTALLMLPSQTVPALGLWLGLAK+EPTALLMLPSQTVPALGLWLGLAK+QILVWTGPGSQTVTFGELDAR
C0MHR2	0.999	Clathrin heavy chain 1	2.6	2	AFMTADLPNELIELLEK+LLEMNLMHAPQVADAILGNQMFTHYDR
I3LUV4	0.999	UDP-glucuronosyltransferase 2B31-like, partial	6.7	2	ANTIASALAQIPQK+TILDELVTR
F1RVZ1	0.9987	Peroxisomal acyl-coenzyme A oxidase 1	41	4	AAASFNPELLTHVLDGSPENTR+AAASFNPELLTHVLDGSPENTRR+EFGLADPDEILWFK+EIENMILSDPDLQHEDLNFLSR
A0A286ZTA4	0.9987	Fructose-bisphosphate aldolase	35.7	4	ELSEIAQR+GILAADESVGTMGNR+GIVLGIK+IKVENTEENRR
F1SLX5	0.9987	Alpha-aminoadipic semialdehyde mitochondrial	5.3	2	LGGDSAQLEAAEWLGLLGDEQVPR+LGSLVATQDLVISLLPYVLHPLVAK
F1RK02	0.9986	Plastin-2 isoform X2	6.1	2	ISTSLPVLDLIDAIQPGSINYDLLK+MINLSVPDTIDER
F1RKI3	0.9985	Histidine triad nucleotide-binding protein 1	41.3	2	IIYEDDQCLAFHDISPQAPTHFLVIPK+KHISQISAAEDDDESLLGHLMIVGK
I3LS94	0.9984	Dimethylaniline monooxygenase [N-oxide-forming]	11.7	2	DIFPPVLEKPTMAVIGFVQSLGAAIPTADLQAR+VLVIGLGNSGCDIATELSHTAEQVIISSR
F1SUB1	0.9984	Pterin-4-alpha-carbinolamine dehydratase	28.8	2	DINLASFIEQVAVSMT+LSAEERDQLLPNLR
I3LIL5	0.9984	Hydroxymethylglutaryl-CoA lyase, mitochondrial	13	2	FPGVNYPVLTPNLR+LVDMLSETGLPVIEVTSFVSPK
F1RFY2	0.9983	Beta-enolase	9.2	2	AAVPSGASTGIYEALELR+SGETEDTFIADLVVGLCTGQIK
F2Z5K9	0.9983	Histone H3	44.9	5	DIQLAR+EIAQDFK+FQSSAVMALQEASEAYLVGLFEDTNLCAIHAK+STELLIR+YRPGTVALR
F2Z558	0.9979	14-3-3 protein zeta delta	16.7	3	DICNDVLSLLEK+DSTLIMQLLR+TAFDEAIAELDTLSEESYK
Q9HC38	0.9979	Glyoxalase domain-containing protein 4	18.1	3	ILTPLVSLDTPGK+KLEWPLSEVAEGVYETEAPGGYK+LELQGIQGAVDHAAAFGR
P26234	0.9971	Vinculin	8.7	2	AIPDLTAPVAAVQAAVSNLVR+TIESILEPVAQQISHLVIMHEEGEVDGK
P00795	0.9967	Cathepsin D	11.6	2	FDGILGMAYPR+ISVNNVVPVFDNLMQQK
A5GFY8	0.9965	D-3-phosphoglycerate dehydrogenase	9.7	2	AQPSNPTMLPTMIGLLAEAR+GLPLLLFR
P21266	0.9964	Glutathione S-transferase Mu 3-like isoform X1	16.7	3	CLDEFPNLKDFITR+LTQSNAILR+LTYVDFLAYDVLDR
F1S7A8	0.9963	Carbohydrate kinase domain-containing protein isoform 1	11.9	2	GVPVVIDADGLWLIAQEPALVQGYQK+LSEAVLGDPLDGR
F2Z528	0.9963	Proteasome subunit alpha type	17.6	2	LNEDMACSVAGITSDANVLTNELR+YLLQYQEPIPCEQLVTALCDIK
F1SR94	0.9951	Aldehyde dehydrogenase family 1 member A3, partial	6.9	2	ILDLIESGKK+VTLELGGK
F2Z5G3	0.9945	Calmodulin	26.2	2	EADIDGDGQVNYEEFVQMMTAK+EAFSLFDKDGDGTITTK
A0A0K2TM43	0.9945	Delta(3,5)-Delta(2,4)-dienoyl-CoA isomerase, mitochondrial	14.6	2	IFPDQEVLLEAALALAAEIASK+MFTSGIDLVDMASDIFQPQGEDVAR
Q9GJT2	0.9945	S-formylglutathione hydrolase	24.7	2	MYSYVTEELPQLINANFPVDPQR+SYPGSQLDILIDQGKDDQFLSDGQLLPDNFIAACTEK
P37059	0.9944	Estradiol 17-beta-dehydrogenase 2	16	3	HLSVLQLDITNSQQIR+NILDDLTPNLQEDYGQDYILK+VSVIQPGSFQTNIAGTSDLWDKLEK
Q8MJ14	0.9943	Glutathione peroxidase 1	34.4	3	EALPTPSDDATALMTDPK+SAAALAAVAPR+SVYAFSARPLAGGEPISLGSLR
Q2EN76	0.994	Nucleoside diphosphate kinase B	25.9	5	EISLWFKPEELVEYK+SAEKEISLWFKPEELVEYK+TFLAVKPDGVQR+VMLGETNPADSKPGTIR+YMGSGPVVAMVWEGLNVVK
F2Z576	0.9937	Histone H3	44.9	5	DIQLAR+EIAQDFK+FQSSAVMALQEACEAYLVGLFEDTNLCAIHAK+STELLIR+YRPGTVALR
F1RII6	0.9936	Hemoglobin subunit epsilon	18.5	2	LLVVYPWTQR+LSELHCDKLHVDPENFR
I3LQH7	0.9935	Flavin reductase (NADPH)	31.1	3	LPAEGPQPAHVVVGDVR+QAADVDKTVAGQDAIIVLLGTR+YVAVMPPHIGDQPLTGAYTVTLDGR
I3LD43	0.9932	Cytosol aminopeptidase	21.7	3	EILNISGPPLK+LREILNISGPPLK+QIQDLEIPSVEVDPCGDAQAAAEGAVLGLYEYDELKQK
F1SMZ6	0.9932	10 kda heat shock mitochondrial	28.4	3	FLPLFDR+GGEIQPVSVK+VVLDDKDYFLFR
F1RR78	0.9927	Spectrin alpha chain, non-erythrocytic 1 isoform X9	3	3	ALINADELANDVAGAEALLDR+QEAFLLNEDLGDSLDSVEALLK+QETFDAGLQAFQQEGIANITALKDQLLAAK
I3LEI5	0.9922	Carboxylesterase 3	20.9	4	AIAESGVITLPGLLDSNPWPLAQSFADSLACPSTSSAEMLQCLR+EAFQELMGDVIMHFPVLEFSR+IKPAWVQADHGAEMPFVFGGPFLTDESSMLAFPDATEEEK+MQFWAETLPTK
F1SAN6	0.9918	Acetolactate synthase-like protein	8.9	2	NAQIAQSPILLLGGAASTLLQNR+VLQLVEETLPDNSILVVDGGDFVGTAAHLVQPR
F1RP17	0.9916	T-complex protein 1 subunit gamma	11.9	3	AVAQALEVIPR+ILQMEEEYIQQLCEDIIHLKPDVVITEK+NVLLDPQLVPGGGASEMAVAHALTEK
F1SC63	0.9912	Cytochrome p450 2c18	25.9	7	DFIDCFLIK+EIDSVIER+FDYTDPNFLTLLEK+FSLMTLR+ILSSPWIQVCNNFPALIDYLPGSHNK+LPPGPTPLPILGNILQLNVK+YIDLIPISVPHAVTR
K7GRY0	0.9901	Ubiquitin-like modifier-activating enzyme 1	5.1	2	IYDDDFFQNLDGVANALDNVDAR+LAYVAAGDLAPINAFIGGLAAQEVMK
P12309	0.9894	Glutaredoxin-1	19.8	2	KTQELLSQLPFK+TQELLSQLPFK
P11708	0.9882	Malate dehydrogenase, cytoplasmic	11.4	2	ELAEEKETAFEFLSSA+IVEGLPINDFSR
I3LC92	0.9854	Mitochondrial enolase superfamily member 1	9.7	2	LAEFKPLWIEEPTCPDDILGHAAISK+YITDVLTEEEAYEILQK
F1SCD0	0.9843	Alpha-1-antichymotrypsin	10.9	2	FASDVFSTNFKDPGAAVVFINDYVK+TPVDPHAIVPSNTDFAFSLYK
P49753	0.9839	Acyl-coenzyme A thioesterase 2, mitochondrial-like, partial	11.6	1	DGVADILHVLNSPLEGPDQK
A7U5U2	0.9838	Ubiquitin B	21.6	1	TITLEVEPSDTIENVK
P62936	0.9836	Peptidyl-prolyl cis-trans isomerase	10.8	2	HVVFGK+TVDNFVALATGEK
F1S3J0	0.9834	Acyl-coenzyme A thioesterase 6 isoform	10.8	1	APALGGSFVGLEPMGLFWALEPEKPLLR
I3LAQ0	0.9831	ig kappa chain v-ii region rpmi 6410	8.3	1	EQLETQTVSVVCLLNSFFPR
P10668	0.9828	Cofilin-1	29.8	1	NIILEEGKEILVGDVGQTVDDPYATFVK
P54819	0.9826	adenylate kinase 2, mitochondrial	11	1	GIHSAIDASQTPDVVFASILAAFSK
Q9GL01	0.9826	Dolichyl-diphosphooligosaccharide--protein glycosyltransferase subunit 2	10.6	2	SIVEEIEDLVAR+TVLLLALTIIAR
F1SAD9	0.982	Protein disulfide-isomerase a4	2.2	1	FAMEPDDFDANALR
Q29315	0.982	60S acidic ribosomal protein P2	10.5	1	NIEDVIAQGIGK
Q6QA25	0.9818	Tropomyosin 3	5.3	1	MLDQTLLDLNEM
F1SNB7	0.9816	NAD kinase 2, mitochondrial isoform 1	3.2	1	ALNEVFIGESLSSR
P50454	0.9813	Serpin H1 precursor	6.2	1	DQAVENILLSPVVVASSLGLVSLGGK
P81140	0.981	Glutaryl-CoA dehydrogenase, mitochondrial	4.5	1	EIISEMGELGVLGPTIK
F2Z4Z1	0.9805	14-3-3 protein gamma	11.7	2	DSTLIMQLLR+ELEAVCQDVLSLLDNYLIK
F1SD70	0.9801	Legumain	6.3	2	DYTGEDVTPQNFLAVLR+LVLNR
I3L6F1	0.9801	60S ribosomal protein L18	8.4	1	ILTFDQLALDSPK
Q9N119	0.9798	3 beta-hydroxysteroid dehydrogenase/Delta 5--)4-isomerase	3.5	1	DLGYEPLFTWEEAK
Q9Y3D6	0.9798	Mitochondrial fission 1 protein	6.6	1	GLALLEELLPK
I3LTR8	0.9768	Retinol dehydrogenase 16	8.2	4	KQTSDRLETVLLDVTK+LETVLLDVTK+QTSDRLETVLLDVTK+VAMIEPGFFK
P80147	0.9755	4-aminobutyrate aminotransferase, mitochondrial	15.7	3	LVQQPQNVSTFINRPALGILPPENFVEK+MLDLYSQISSIPIGYSHPALVK+TVAGIIVEPIQSEGGDNHASDDFFR
A0A287BI42	0.9751	Adipocyte plasma membrane-associated protein	6.8	1	LFENQLIGPESIANIGDVLFTGTADGR
F1SJ34	0.9744	Cytochrome c oxidase subunit mitochondrial	19.7	1	EIYPYVIQELRPTLNELGISTPEELGLDKV
F1S8X9	0.9736	4-hydroxy-2-oxoglutarate aldolase, mitochondrial	12.3	1	VADLSPIPVVLYSVPANTGLDLPVDAVVTLSQHPNIVGIK
F1RMF6	0.9711	Glycine n-acyltransferase	19.7	4	ILYITPEMAIK+MGATLPEYR+QHLQIQSSQPSLDEVIQNLATTK+VYGTVFHMNQGNPFK
F1RJ93	0.9672	Transgelin-2	9	1	YGINTTDIFQTVDLWEGK
I3L5B2	0.9671	40s ribosomal protein s7	17	2	DVNFEFPEFQL+TLTAVHDAILEDLVFPSEIVGK
F1RYU4	0.9646	Aldo-keto reductase family 1 member c3	15.7	4	IADGTVKR+ILNKPGLK+LLQDPVLNAIAEK+YKPVCNQVECHPYLNQSK
F1SQX8	0.9639	D-beta-hydroxybutyrate dehydrogenase, mitochondrial	18.3	2	MQIMTHLPGAISDR+VSVVEPGNFIVATSLYSPER
P80031	0.9611	Glutathione s-transferase p	19.9	2	EAALVDMVNDGVEDLR+IHQVLNPSCLDAFPLLSAYVAR
Q9GMB0	0.9606	Dolichyl-diphosphooligosaccharide--protein glycosyltransferase subunit 1	4.8	2	ALTSEVALLQSR+LVDHVFDEQVIDSLTVK
P53590	0.9603	Succinyl-CoA ligase [GDP-forming] subunit beta, mitochondrial	7.4	2	LEGTNVHEAQNILTNSGLPITSAVDLEDAAK+LEGTNVHEAQNILTNSGLPITSAVDLEDAAKK
F1SDP2	0.96	Phospholysine phosphohistidine inorganic pyrophosphate phosphatase]	9.1	1	ADGYVDNLAEAVDLLLQHADQ
F1SGG9	0.9434	Uncharacterized protein	3.6	2	FASFIDK+NLDLDSIIAEVK
F1SF87	0.942	Calcium-binding mitochondrial carrier protein aralar2	5.8	1	ASLASEDGQISPGSLLLAGAIAGMPAASLVTPADVIK
F1SDN2	0.9266	Trifunctional enzyme subunit mitochondrial	18.3	4	DVVDYLVFGTVIQEVK+LKPAFIKPYGTVTAANSSFLTDGASAVLIMAEEK+LNFLSPELPAVAEFSTSETMGHSADR+TSVPKDVVDYLVFGTVIQEVK
I3LFI3	0.9264	NDRG2	8.7	1	LTGLTSSISEMILGHLFSQEELSGNSELIQK
F1SQH7	0.926	solute carrier family 27 (fatty acid transporter), member 2 isoform X1	3.5	1	VLLASPDLQAAIEEVLPSLK
K7GPC4	0.9158	Plastin-3	6.5	2	MINLSVPDTIDER+TISSSLAVVDLIDAIQPGCINYDLVK
F1RYM4	0.9152	acyl-CoA synthetase short-chain family member 3, mitochondrial	5.4	2	DINITEGQVLEEIVQHVR+VTPTIEDPSIFGHIEEVLK
A9XFX6	0.9043	F-actin-capping protein subunit beta	20.2	1	NLSDLIDLVPSLCEDLLSSVDQPLK
A0A1B2TT84	0.9035	Cytochrome P450, subfamily IIIA, polypeptide 22	6.2	2	LSSQGLIQPEKPILLK+RVDLLQLMINSQNSK
