# Supplementary material for: A comparative analysis of label-free liquid chromatography-mass spectrometry liver proteomic profiles highlights metabolic differences between pig breeds
Source: PLoS One. 2018 Sep 12;13(9):e0199649. doi: 10.1371/journal.pone.0199649 (PMC6135354; doi:10.1371/journal.pone.0199649)
Supplement: S2 Table — (XLSX) [file pone.0199649.s002.xlsx]

## Sheet: S2_Table
S2 Table. Full list of the 200 proteins analysed in this study.
Uniprot accession	Protein description	Symbol	Unique Peptides
F1SSS0	Carbamoyl-phosphate synthase 1	CPS1	39
I3LEN7	10-formyltetrahydrofolate dehydrogenase	ALDH1L1	24
Q29550	Liver carboxylesterase	CES1	17
C5I4T6	Phosphoenolpyruvate carboxykinase 2	PCK2	14
F1SLA0	ATP synthase subunit beta	ATP5B	13
F1S0X9	Argininosuccinate synthase 1	ASS1	12
Q95JC8	Arginase-1	ARG1	11
D3K5L3	Catechol-O-methyltransferase	COMT	11
P09571	Serotransferrin	TF	10
D0G0B3	Acetyl-Coenzyme A acyltransferase 2	ACAA2	10
I3LDH5	Aldehyde oxidase	AOX1	10
A0A2C9F397	Triokinase/FMN cyclase	TKFC	10
DHE3_BOVIN	Glutamate dehydrogenase 1, mitochondrial	GLUD1	9
P49924	Fatty acid-binding protein, liver	FABP1	9
F1RWY0	Regucalcin	RGN	9
I3LSY0	Acyl-CoA synthetase medium chain family member 4	ACSM4	9
K7GP28	Hydroxysteroid 17-beta dehydrogenase 10	HSD17B10	9
Q1KLB4	Putative aldo-keto reductase family 1 member C1		9
A0A287B8D4	Uncharacterized protein	LOC110255172	9
O46658	Vitamin D(3) 25-hydroxylase	CYP2D25	8
P00346	Malate dehydrogenase,	MDH2	8
Q767L7	Tubulin beta chain (Tubulin beta-5 chain)	TUBB	8
A0A287AA21	Enoyl-CoA hydratase, mitochondrial	ECHS1	8
F1RII7	Hemoglobin subunit beta	HBB	8
F1RQP0	Peroxiredoxin-5, mitochondrial	PRDX5	8
F1RXQ9	Ornithine carbamoyltransferase, mitochondrial	OTC	8
F1S2N0	Glutathione S-transferase zeta 1	GSTZ1	8
F1ST01	Selenium binding protein 1	SELENBP1	8
A0A287BPT2	Alcohol dehydrogenase 1C (class I), gamma polypeptide	ADH1C	8
A0A287BQT2	Aconitase 1	ACO1	7
A5YV76	Fatty acid synthase	FASN	7
A8U4R4	Transketolase	tkt	7
D0G7F6	Triosephosphate isomerase	TPI1	7
F1RF50	Dimethylglycine dehydrogenase	DMGDH	7
F1RKG8	Phosphatidylethanolamine-binding protein 1	PEBP1	7
F1S1E7	Dihydropyrimidinase	DPYS	7
F1S3H1	Aldehyde dehydrogenase 6 family member A1	ALDH6A1	7
I3LDH7	Formimidoyltransferase-cyclodeaminase	FTCD	7
Q0PY11	Elongation factor 1-alpha	EEF1A	7
Q28956	17beta-estradiol dehydrogenase		7
F1SND2	Alanine--glyoxylate aminotransferase 2, mitochondrial	AGXT2	7
P00348	Hydroxyacyl-coenzyme A dehydrogenase, mitochondrial	HADH	6
P00355	Glyceraldehyde-3-phosphate dehydrogenase	GAPDH	6
P00636	Fructose-1,6-bisphosphatase 1	FBP1	6
P01965	Hemoglobin subunit alpha	HBA	6
P03974	Transitional endoplasmic reticulum ATPase	VCP	6
Q2XVP4	Tubulin alpha-1B chain	TUBA1B	6
A0A287B1V1	Acyl-CoA dehydrogenase, short/branched chain	ACADSB	6
F1RJS3	Bifunctional epoxide hydrolase 2	EPHX2	6
F1RPH0	Phosphoglycerate kinase	PGK1	6
F1RPS8	ATP synthase subunit alpha	ATP5A1	6
I3LIA4	Guanidinoacetate N-methyltransferase	GAMT	6
I3LK59	Enolase 1	ENO1	6
P00503	Aspartate aminotransferase, cytoplasmic	GOT1	5
P16549	Dimethylaniline monooxygenase [N-oxide-forming] 1	FMO1	5
P37111	Aminoacylase-1	ACY1	5
P50441	Glycine amidinotransferase, mitochondrial	GATM	5
P51781	Glutathione S-transferase alpha M14	-	5
P79381	Epoxide hydrolase 1	EPHX1	5
Q9N1F5	Glutathione S-transferase omega-1	GSTO1	5
A0A286ZKH3	Sepiapterin reductase	SPR	5
A0A286ZQ63	SEC14 like lipid binding 3	SEC14L3	5
A0A286ZQA7	Sulfurtransferase	TST	5
A0A287AR05	Succinate-semialdehyde dehydrogenase, mitochondrial	ALDH5A1	5
B1A8Z3	Alpha-1,4 glucan phosphorylase		5
E1CAJ6	Protein disulfide isomerase P5	pdi-p5	5
F1RRB7	Acetyl-CoA acyltransferase 1	ACAA1	5
F1RS36	78 kDa glucose-regulated protein	HSPA5	5
F1RW28	Hydroxysteroid 17-beta dehydrogenase 13	HSD17B13	5
F1S0Y8	Alcohol dehydrogenase 4	ADH4	5
F1S814	Phosphoglucomutase 1	PGM1	5
F1SGG1	Keratin 18	KRT18	5
F1SJX1	Electron transfer flavoprotein alpha subunit	ETFA	5
I3LDC7	Isocitrate dehydrogenase [NADP]	IDH1	5
I3LII3	Eukaryotic translation elongation factor 2	EEF2	5
Q3S3F7	Sulfotransferase	SULT2A1	5
Q7YS28	Pyruvate carboxylase	PC	5
O02705	Heat shock protein HSP 90-alpha	HSP90AA1	4
P08059	Glucose-6-phosphate isomerase	GPI	4
P28491	Calreticulin	CALR	4
P79383	Cytochrome P450 2E1	CYP2E1	4
Q02110	4-hydroxyphenylpyruvate dioxygenase	HPD	4
Q0MVN8	Quinone oxidoreductase	CRYZ	4
Q29092	Endoplasmin	HSP90B1	4
Q29554	Trifunctional enzyme subunit alpha, mitochondrial	HADHA	4
E1CAJ5	Protein disulfide-isomerase	grp-58	4
F1RKC9	Serine dehydratase like	SDSL	4
F1RKM1	Aldehyde dehydrogenase 7 family member A1	ALDH7A1	4
F1RL81	Hydroxysteroid 17-beta dehydrogenase 14	HSD17B14	4
F1RSZ3	Acyl-CoA synthetase long chain family member 1	ACSL1	4
F1S0C1	S-(hydroxymethyl)glutathione dehydrogenase	ADH5	4
F1SA74	Methylenetetrahydrofolate dehydrogenase (NADP+ dependent) 1	MTHFD1	4
F1SEN2	Glutamate dehydrogenase 1, mitochondrial	GLUD1	4
F1SN27	Sorbitol dehydrogenase	SORD	4
I3LB63	Uncharacterized protein	LOC100518109	4
I3LD43	Cytosol aminopeptidase	LAP3	4
I3LVF1	Hydroxyacid oxidase 1	HAO1	4
Q6YN43	Cytochrome p450 2A6	CYP2A6	4
Q8SQ65	Cytochrome P450 2C49	CYP2C49	4
I3LJ48	Enoyl-CoA hydratase and 3-hydroxyacyl CoA dehydrogenase	EHHADH	4
CATA_HUMAN	Catalase	CAT	3
K1C10_HUMAN	Keratin, type I cytoskeletal 10	KRT10	3
K1C9_HUMAN	Keratin, type I cytoskeletal 9	KRT9	3
K2C1_HUMAN	Keratin, type II cytoskeletal 1	KRT1	3
P01025	Complement C3	C3	3
P04178	Superoxide dismutase	SOD1	3
P41367	Medium-chain specific acyl-CoA dehydrogenase, mitochondrial	ACADM	3
P79384	Propionyl-CoA carboxylase beta chain, mitochondrial	PCCB	3
Q19QT7	Cystathionine gamma-lyase	CTH	3
Q29073	Prostaglandin reductase 1	PTGR1	3
Q6Q7J2	Rab GDP dissociation inhibitor beta	GDI2	3
Q8MJ30	Dihydropteridine reductase	QDPR	3
Q9GJX5	Taurochenodeoxycholic 6 alpha-hydroxylase	CYP4A21	3
Q9TV69	Trans-1,2-dihydrobenzene-1,2-diol dehydrogenase	DHDH	3
A0A286ZI55	Glycerol-3-phosphate dehydrogenase [NAD(+)]	GPD1	3
A0A287AJQ2	Phosphoglycerate mutase	PGAM1	3
A0A287AR55	Fumarate hydratase, mitochondrial	FH	3
F1RI39	Actinin alpha 4	ACTN4	3
F1RIF3	Fumarylacetoacetate hydrolase	FAH	3
F1RIS8	Mevalonate kinase	MVK	3
F1RJH8	Argininosuccinate lyaseein	ASL	3
F1RL41	Beta-ureidopropionase 1	UPB1	3
F1RMH5	Urocanate hydratase 1	UROC1	3
F1S0M2	2-iminobutanoate/2-iminopropanoate deaminase	RIDA	3
F1S0Z3	Microsomal triglyceride transfer protein large subunit	MTTP	3
F1S3H7	Prostaglandin reductase 2	PTGR2	3
F1S9I9	Mitochondrial amidoxime reducing component 2	MARC2	3
F1SGG2	Keratin, type II cytoskeletal 8	KRT8	3
I3LAB7	Sterol 26-hydroxylase, mitochondrial	CYP27A1	3
I3LDY2	Uncharacterized protein	LOC100625049	3
I3LIM2	UDP-glucose 6-dehydrogenase	UGDH	3
I3LLX8	Sulfotransferase	SULT1A3	3
I3LM03	Carbonyl reductase	LOC100622246	3
I3LN42	GC, vitamin D binding protein	GC	3
I3LNB4	Delta-1-pyrroline-5-carboxylate mitochondrial	ALDH4A1	3
I3LQA1	Aldehyde dehydrogenase 8 family member A1	ALDH8A1	3
I3LVE1	Ketohexokinase	KHK	3
Q0R678	DJ-1 protein	PARK7	3
P00439	Phenylalanine hydroxylase	PAH	3
A0A287A5C8	Chromosome 3 open reading frame 70	C3orf70	3
A0A287BDD8	Solute carrier family 27 member 5	SLC27A5	3
I3LAK4	Pyruvate kinase	PKLR	3
A0A286ZTA4	Fructose-bisphosphate aldolase	ALDOB	3
A0A287B6U1	Solute carrier family 27 member 5	SLC27A5	3
ALBU_BOVIN	Serum albumin	ALB	2
P00506	Aspartate aminotransferase, mitochondrial	GOT2	2
P00761	Trypsin	PRSS1	2
P12026	Acyl-CoA-binding protein	DBI	2
P16276	Aconitate hydratase, mitochondrial	ACO2	2
P18648	Apolipoprotein A-I	APOA1	2
P53590	Succinate--CoA ligase [GDP-forming] subunit beta, mitochondrial	SUCLG2	2
Q5S1S4	Carbonic anhydrase 3	CA3	2
Q5S1U1	Heat shock protein beta-1	HSPB1	2
Q710C4	Adenosylhomocysteinase	AHCY	2
Q9GJT2	S-formylglutathione hydrolase	ESD	2
A0A286ZIW5	IlvB acetolactate synthase like	ILVBL	2
A0A287A5T1	Abhydrolase domain containing 14B	ABHD14B	2
A7J0B0	Acyl-coenzyme A oxidase	ACOX1	2
C0MHR2	Clathrin heavy chain	CLTC	2
C4MRC5	ADP-ribosylation factor 2	ARF3	2
D0G0C7	Antioxidant protein 1 homolog	ATOX1	2
D6QST6	2,4-dienoyl-CoA reductase 1	DECR1	2
F1RJH2	Short-chain-specific acyl-CoA dehydrogenase, mitochondrial	ACADS	2
F1RR78	Spectrin alpha, non-erythrocytic 1	SPTAN1	2
F1RUR0	UDP-glucuronosyltransferase	UGT2B31	2
F1RXC2	Carbonic anhydrase 2	CA2	2
F1RYY6	Transaldolase	TALDO1	2
F1S0R9	Sarcosine dehydrogenase	SARDH	2
F1S2X3	Ethylmalonyl-CoA decarboxylase 1	ECHDC1	2
F1S325	Putative hydroxypyruvate isomerase	HYI	2
F1S418	Thioredoxin-dependent peroxide reductase, mitochondrial	PRDX3	2
F1SCD0	Uncharacterized protein	LOC396685	2
F1SF47	Hydroxysteroid 11-beta dehydrogenase 1	HSD11B1	2
F1SHU0	3-hydroxyisobutyrate dehydrogenase	HIBADH	2
F1SKJ1	Myosin heavy chain 9	MYH9	2
F1SLX5	Aminoadipate-semialdehyde synthase	AASS	2
F1SMZ6	10 kDa heat shock protein, mitochondrial	HSPE1	2
F1SSR4	Isovaleryl-CoA dehydrogenase	IVD	2
F1SUP1	Uncharacterized protein	AKR7A2	2
F1SUU6	Agmatinase	AGMAT	2
F2Z558	14-3-3 protein zeta/delta	YWHAZ	2
F2Z5G3	Calmodulin	CALM3	2
I3LEH4	Amine oxidase	MAOB	2
I3LEI5	Carboxylic ester hydrolase	CES3	2
I3LK75	Nicotinate-nucleotide pyrophosphorylase [carboxylating]	QPRT	2
I3LP02	Acetyl-CoA acetyltransferase 1	ACAT1	2
I3LQS0	Heterogeneous nuclear ribonucleoprotein K	HNRNPK	2
K7GRY0	Ubiquitin like modifier activating enzyme 1	UBA1	2
A0A286ZTA4	Fructose-bisphosphate aldolase B	ALDOB	2
F1SM20	UDP-glucuronosyltransferase	UGT1A6	2
F2Z580	Histone H2B	HIST1H2BB	2
A0A287B0Z8	Indolethylamine N-methyltransferase	INMT	2
P11708	Malate dehydrogenase, cytoplasmic	MDH1	2
F2Z4Z1	14-3-3 protein gamma	YWHAG	2
F1RKI3	Histidine triad nucleotide-binding protein 2, mitochondrial	HINT1	2
I3LIA4	Guanidinoacetate N-methyltransferase	GAMT	2
F1S605	Glutathione S-transferase	GSTM3	2
P40125	Adenylyl cyclase-associated protein 1	CAP1	2
A0A287AXR4	Arylacetamide deacetylase	LOC100623616	2
Q8CGP5	Histone H2A type 1-F	Hist1h2af	2
